# Supplementary material for: Dual space divergence in small molecule quasiracemates: benzoyl leucine and phenylalanine assemblies
Source: Royal Society of Chemistry journal article supplement (doi:10.1039/d3cc06212k), 2024-01-01
Supplement: d3cc06212k1.pdf [file d3cc06212k1.pdf]

Electronic Supplemental Information for:

## **Dual Space Divergence in Small Molecule Quasiracemates: Benzoyl Leucine and Phenylalanine Assemblies**

Katelyn N. Koch, Aaron J. Teo and Kraig A. Wheeler\*

Department of Chemistry, Whitworth University, 300 West Hawthorne Road, Spokane, Washington, 99251, USA. Email: kraigwheeler@whitworth.edu.

### Table of Contents

- SI 1. Synthesis of Materials
- SI 2. Hot Stage Thermomicroscopy
- SI 3. Crystallographic Data
- SI 4. CCDC-Mercury Crystal Structure Similarities
- SI 5. Crystal Lattice Energy Calculations and Assessments
- SI 6. Crystal Structure Cavity Space and Packing Efficiency Determinations
- SI 7. CCDC-CSD Search Parameters

## SI 1. Synthesis of Materials

### General Considerations

All chemicals and solvents were purchased from the Sigma-Aldrich Chemical Co. and VWR Scientific and used as received without further purification unless stated otherwise.  $^1\text{H}$  NMR spectral data were recorded with a 400 MHz JEOL 400SS spectrometer using the Delta software (4.3.6.0). Spectral data are referenced using the solvent residual signal as an internal standard, and chemical shift values are expressed as  $\delta$  values (ppm) and the value of coupling constants ( $J$ ) in Hertz (Hz). The following abbreviations were used for signal multiplicities: s, singlet; d, doublet; dd, doublet of doublets; t, triplet; q, quartet; m, multiplet; and br, broad.

### Material Preparation

The synthetic strategies used to prepare the 4-substituted benzoyl amino acid derivatives were adapted from previously reported methods.<sup>1</sup> The following general procedure, as described for *N*-(*p*-methylbenzoyl)-L-leucine, was used to generate the homologous series of benzoyl amino acids.

#### *N*-(*p*-methylbenzoyl)-L-leucine, L-1-CH<sub>3</sub>

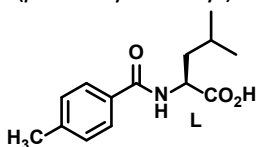

$^1\text{H-NMR}$  (Acetone- $d_6$ ):  $\delta$  7.80 (d,  $J=8.2$  Hz, 2H, Ar-H); 7.7 (bd,  $J=7.8$  Hz, 1H, N-H); 7.23 (d,  $J=8.2$  Hz, 2H, Ar-H); 4.71 (ddd,  $J=10.2$  Hz, 7.8 Hz, 4.6 Hz, 1H, CH); 2.34 (s, 3H, CH<sub>3</sub>); 1.88-1.65 (m, 3H, CH and CH<sub>2</sub>); 0.95 (d,  $J=6.4$  Hz, 3H, CH<sub>3</sub>); 0.94 (d,  $J=6.4$  Hz, 3H, CH<sub>3</sub>).

L-Leucine (0.2049 g, 1.56 mmol) and 1.55 mL of 1M NaOH (1.55 mmol) were added to a 50 mL round-bottom flask and stirred at room temperature for 5-10 minutes until dissolution. *p*-Toluoyl chloride (0.2566 g, 1.66 mmol) and 1.55 mL of 1M NaOH (1.55 mmol) were added to the clear colorless homogenous mixture simultaneously over 15 minutes and allowed to stir at 0°C for 2 hours. The reaction was then heated at ~70°C for an additional hour, cooled to room temperature, and acidified at 0°C with 6M HCl to a pH of 2. The mixture was extracted with 2x10 mL of EtOAc, the organic layers combined, dried over anhydrous MgSO<sub>4</sub> and reduced under *vacuo* to give L-1-CH<sub>3</sub> as a white solid (0.336 g, 1.14 mmol, 73% yield).

Reaction yields of 65-95% were attained for the CH<sub>3</sub>, Cl, H, and CF<sub>3</sub> benzoyl leucine and phenylalanine derivatives.

#### *N*-(*p*-methylbenzoyl)-D-leucine, D-1-CH<sub>3</sub>

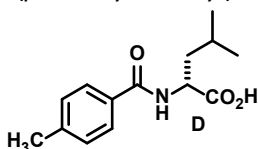

$^1\text{H-NMR}$  (Acetone- $d_6$ ):  $\delta$  7.80 (d,  $J=8.2$  Hz, 2H, Ar-H); 7.72 (bd,  $J=8.2$ , 1H, N-H); 7.24 (d,  $J=8.2$  Hz, 2H, Ar-H); 4.71 (ddd,  $J=10.1$  Hz, 8.2 Hz, 5.0 Hz, 1H, CH); 2.36 (s, 3H, CH<sub>3</sub>); 1.87-1.67 (m, 3H, CH and CH<sub>2</sub>); 0.95 (d,  $J=6.4$  Hz, 3H, CH<sub>3</sub>); 0.94 (d,  $J=6.4$  Hz, 3H, CH<sub>3</sub>).

#### *N*-(*p*-methylbenzoyl)-L-phenylalanine, L-2-CH<sub>3</sub>

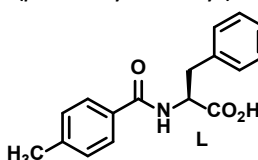

$^1\text{H-NMR}$  (Acetone- $d_6$ ):  $\delta$  7.70 (d,  $J=8.2$  Hz, 2H, Ar-H); 7.65 (bd,  $J=7.8$  Hz, 1H, N-H); 7.31 (d,  $J=8.2$  Hz, 2H, Ar-H); 7.28-7.14 (m, 5 H, Ar-H); 4.88 (ddd,  $J=9.2$  Hz, 7.8 Hz, 5.0 Hz, 1H, CH); 3.30 (dd,  $J=13.8$ , 5.0 Hz, 1H, CH<sub>2</sub>); 3.13 (dd,  $J=13.8$ , 9.2 Hz, 1H, CH<sub>2</sub>); 2.33 (s, 3H, CH<sub>3</sub>).

*N*-(*p*-methylbenzoyl)-D-phenylalanine, D-2-CH<sub>3</sub>

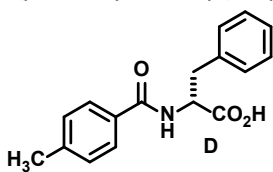

<sup>1</sup>H-NMR (Acetone-*d*<sub>6</sub>): δ 7.71 (d, *J*=8.1 Hz, 2H, Ar-H); 7.65 (bd, *J* = 8.0 Hz, 1H, N-H); 7.31 (d, *J*=8.1 Hz, 2H, Ar-H); 7.28-7.14 (m, 5H, Ar-H); 4.88 (ddd, *J*=9.6 Hz, 8.0 Hz, 5.0 Hz, 1H, CH); 3.30 (dd, *J* = 13.8, 5.0 Hz, 1H, CH<sub>2</sub>); 3.13 (dd, *J*=13.8, 9.6 Hz, 1H, CH<sub>2</sub>); 2.33 (s, 3H, CH<sub>3</sub>).

*N*-(*p*-chlorobenzoyl)-L-leucine, L-1-Cl

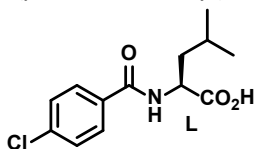

<sup>1</sup>H-NMR (Acetone-*d*<sub>6</sub>): δ 8.02 (bd, *J*=8.4 Hz, 1H, N-H); 7.91 (d, *J*=8.2 Hz, 2H, Ar-H); 7.46 (d, *J*=8.2 Hz, 2H, Ar-H); 4.70 (ddd, *J*=10.1, 8.4, 5.0 Hz, 1H, CH); 1.87-1.65 (m, 3H, CH and CH<sub>2</sub>); 0.94 (d, *J* = 6.4 Hz, 3H, CH<sub>3</sub>); 0.92 (d, *J*=6.4 Hz, 3H, CH<sub>3</sub>).

*N*-(*p*-chlorobenzoyl)-D-leucine, D-1-Cl

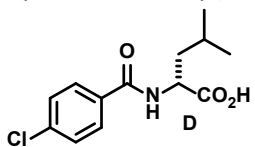

<sup>1</sup>H-NMR (Acetone-*d*<sub>6</sub>): δ 8.01 (bd, *J*=8.2 Hz, 1H, N-H); 7.91 (d, *J*=8.7 Hz, 2H, Ar-H); 7.46 (d, *J*=8.7 Hz, 2H, Ar-H); 4.71 (ddd, *J*=10.1, 8.2, 5.0 Hz, 1H, CH); 1.87-1.65 (m, 3H, CH and CH<sub>2</sub>); 0.94 (d, *J* = 6.4 Hz, 3H, CH<sub>3</sub>); 0.92 (d, *J*=6.4 Hz, 3H, CH<sub>3</sub>).

*N*-(*p*-chlorobenzoyl)-L-phenylalanine, L-2-Cl

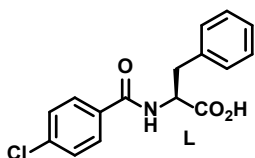

<sup>1</sup>H-NMR (Acetone-*d*<sub>6</sub>): δ 7.88 (bd, *J*=8.6 Hz, 1H, N-H); 7.81 (d, *J*=8.2 Hz, 2H, Ar-H); 7.45 (d, *J*=8.2 Hz, 2H, Ar-H); 7.35-7.14 (m, 5 H, Ar-H); 4.99 (ddd, *J*= 9.0, 8.6, 5.0 Hz, 1H, CH); 3.31 (dd, *J*=13.8, 5.0 Hz, 1H, CH<sub>2</sub>); 3.12 (dd, *J* = 13.8, 9.0 Hz, 1H, CH<sub>2</sub>).

*N*-(*p*-chlorobenzoyl)-D-phenylalanine, D-2-Cl

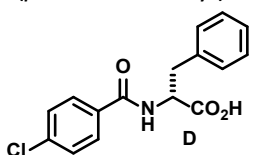

<sup>1</sup>H-NMR (Acetone-*d*<sub>6</sub>): δ 7.89 (bd, *J*=8.2 Hz, 1H, N-H); 7.81 (d, *J*=8.6 Hz, 2H, Ar-H); 7.44 (d, *J*=8.6 Hz, 2H, Ar-H); 7.35-7.14 (m, 5 H, Ar-H); 4.93 (ddd, *J*=9.1, 8.2, 5.1 Hz, 1H, CH); 3.31 (dd, *J*=13.8, 5.1 Hz, 1H, CH<sub>2</sub>); 3.12 (dd, *J*=13.8, 9.1 Hz, 1H, CH<sub>2</sub>).

*N*-benzoyl-L-leucine, L-1-H

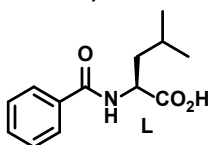

<sup>1</sup>H-NMR (Acetone-*d*<sub>6</sub>): δ 7.95-7.87 (m, 2H, Ar-H); 7.80 (bd, *J*=8.2 Hz, 1H, N-H); 7.54-7.47 (m, 1H, Ar-H); 7.46-7.40 (m, 2H, Ar-H); 7.35-7.14 (m, 5 H, Ar-H); 4.93 (ddd, *J*=10.1, 8.2, 4.6 Hz, 1H, CH); 1.88-1.65 (m, 3H, CH and CH<sub>2</sub>); 0.95 (d, *J* = 6.4 Hz, 3H, CH<sub>3</sub>); 0.94 (d, *J* = 6.4 Hz, 3H, CH<sub>3</sub>).

*N*-benzoyl-D-leucine, D-1-H

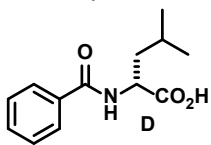

$^1\text{H-NMR}$  (Acetone- $d_6$ ):  $\delta$  7.95-7.87 (m, 2H, Ar-H); 7.78 (bd,  $J=8.2$  Hz, 1H, N-H); 7.54-7.47 (m, 1H, Ar-H); 7.46-7.40 (m, 2H, Ar-H); 7.35-7.14 (m, 5H, Ar-H); 4.91 (ddd,  $J=10.1, 8.2$  Hz, 4.9 Hz, 1H, CH); 1.88-1.65 (m, 3H, CH and  $\text{CH}_2$ ); 0.94 (d,  $J=6.4$  Hz, 3H,  $\text{CH}_3$ ); 0.94 (d,  $J=6.4$  Hz, 3H,  $\text{CH}_3$ ).

*N*-benzoyl-L-phenylalanine, L-2-H

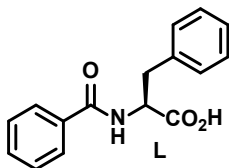

$^1\text{H-NMR}$  (Acetone- $d_6$ ):  $\delta$  7.75-7.80 (m, 2H, Ar-H); 7.75 (bd,  $J=8.0$  Hz, 1H, N-H); 7.53-7.37 (m, 1H, Ar-H); 7.36-7.15 (m, 5H, Ar-H); 4.91 (ddd,  $J=9.2$  Hz, 8.0 Hz, 5.0 Hz, 1H, CH); 3.32 (dd,  $J=13.8, 5.0$  Hz, 1H,  $\text{CH}_2$ ); 3.14 (dd,  $J=13.8, 9.2$  Hz, 1H,  $\text{CH}_2$ ).

*N*-benzoyl-D-phenylalanine, D-2-H

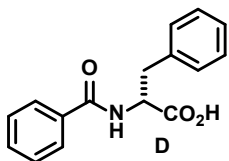

$^1\text{H-NMR}$  (Acetone- $d_6$ ):  $\delta$  7.77-7.82 (m, 2H, Ar-H); 7.75 (bd,  $J=8.1$  Hz, 1H, N-H); 7.53-7.37 (m, 1H, Ar-H); 7.36-7.15 (m, 5H, Ar-H); 4.90 (ddd,  $J=9.2, 8.1, 4.8$  Hz, 1H, CH); 3.32 (dd,  $J=13.7, 4.8$  Hz, 1H,  $\text{CH}_2$ ); 3.14 (dd,  $J=13.7, 9.2$  Hz, 1H,  $\text{CH}_2$ ).

*N*-(*p*-trifluoromethylbenzoyl)-L-leucine, L-1- $\text{CF}_3$

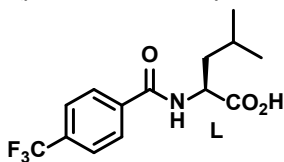

$^1\text{H-NMR}$  (Acetone- $d_6$ ):  $\delta$  8.10 (d,  $J=8.2$  Hz, 2H, Ar-H); 8.05 (bd,  $J=8.3$  Hz, 1H, N-H); 7.80 (d,  $J=8.2$  Hz, 2H, Ar-H); 4.73 (ddd,  $J=10.1, 8.3, 5.0$  Hz, 1H, CH); 1.88-1.69 (m, 3H, CH and  $\text{CH}_2$ ); 0.96 (d,  $J=6.4$  Hz, 3H,  $\text{CH}_3$ ); 0.94 (d,  $J=6.4$  Hz, 3H,  $\text{CH}_3$ ).

*N*-(*p*-trifluoromethylbenzoyl)-D-leucine, D-1- $\text{CF}_3$

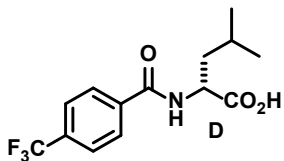

$^1\text{H-NMR}$  (Acetone- $d_6$ ):  $\delta$  8.10 (d,  $J=8.2$  Hz, 2H, Ar-H); 8.05 (bd,  $J=8.2$  Hz, 1H, N-H); 7.80 (d,  $J=8.2$  Hz, 2H, Ar-H); 4.73 (ddd,  $J=10.1, 8.2, 5.0$  Hz, 1H, CH); 1.88-1.68 (m, 3H, CH and  $\text{CH}_2$ ); 0.95 (d,  $J=6.4$  Hz, 3H,  $\text{CH}_3$ ); 0.94 (d,  $J=6.4$  Hz, 3H,  $\text{CH}_3$ ).

*N*-(*p*-trifluoromethylbenzoyl)-L-phenylalanine, L-2- $\text{CF}_3$

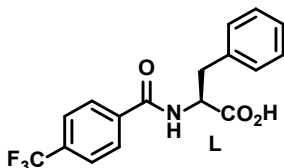

$^1\text{H-NMR}$  (Acetone- $d_6$ ):  $\delta$  8.17 (bd,  $J=8.0$  Hz, 1H, N-H); 8.02 (d,  $J=8.3$  Hz, 2H, Ar-H); 7.75 (d,  $J=8.3$  Hz, 2H, Ar-H); 7.37-7.09 (m, 5H, Ar-H); 4.75 (ddd,  $J=9.2, 8.0$  and 4.6 Hz, 1H, CH); 3.29 (dd,  $J=13.8$  Hz and 4.6 Hz, 1H,  $\text{CH}_2$ ); 3.14 (dd,  $J=13.8$  and 9.2 Hz, 1H,  $\text{CH}_2$ ).

*N*-(*p*-trifluoromethylbenzoyl)-D-phenylalanine, D-2-CF<sub>3</sub>

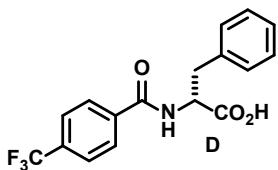

<sup>1</sup>H-NMR (Acetone-*d*<sub>6</sub>): δ 8.18 (bd, *J*=7.8 Hz, 1H, N-H); 8.02 (d, *J*=8.2 Hz, 2H, Ar-H); 7.76 (d, *J*=8.2, 2H, Ar-H); 7.34-7.08 (m, 5H, Ar-H); 4.69 (ddd, *J*=9.1, 7.8, 4.5 Hz, 1H, CH); 3.29 (dd, *J*=13.8 Hz, 4.5 Hz, 1H, CH<sub>2</sub>); 3.12 (dd, *J*= 13.8 and 9.1 Hz, 1H, CH<sub>2</sub>).

### *Cocrystal Synthesis*

The racemic and quasiracemic cocrystals prepared for this study used slow evaporation of methanolic solutions with equimolar mixtures (10-20 mg scale) of the L and D forms of the components. Crystals suitable for X-ray diffraction and DSC studies were retrieved after 1-5 days.

## SI 2. Hot Stage Thermomicroscopy

The hot-stage microscopy experiments were performed using an optical polarizing microscope (*Olympus SZX10*) equipped with an *Instec HCS 302* hot stage connected to an *Instec mk2000* temperature controller. Micrographs were collected under a range of magnifications (3.0-6.3x) using an attached video camera. The hot stage was controlled by the WINDV software package (V1.0.120820). Pairs of benzoyl amino acid components were analyzed for cocrystallization behavior. Samples were prepared using standard glass microscope slides and cover slips. The higher melting point component was deposited first by heating the sample to the melting point temperature and drawing the sample under the cover slip. After cooling, the lower melting point component was deposited similarly to create a contact interface between the two samples. These bimolecular samples were heated at a ramp rate of 2-5°C/min until complete melting of the sample occurred. Each CH<sub>3</sub>/Cl and H/CF<sub>3</sub> family of compounds (4 racemates and 6 quasiracemates) was processed using the video-assisted hot stage technique.

### *Hot Stage Images of Racemic and Quasiracemic Pairs*

#### CH<sub>3</sub>/Cl System

#### Racemic Mixtures

L-1-CH<sub>3</sub> (left)

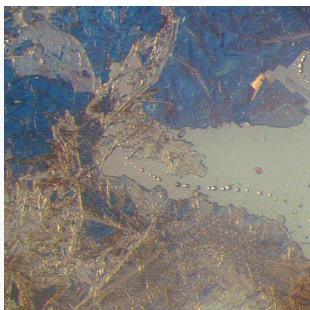

81.6 °C

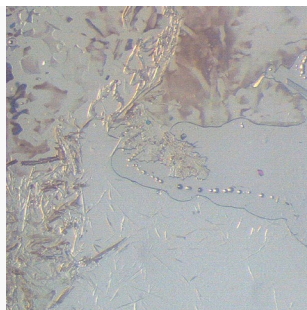

113.5 °C

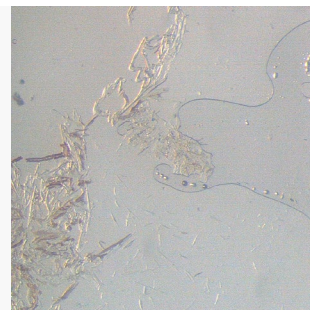

121.9 °C

D-1-CH<sub>3</sub> (right)

L-1-Cl (left)

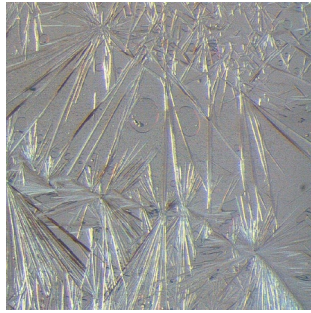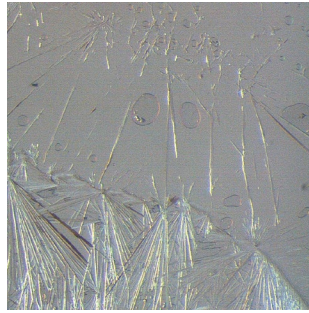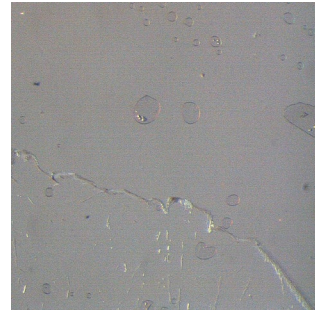

D-1-Cl (right)

99.8°

136.1°

145.4°

L-2-CH<sub>3</sub> (left)

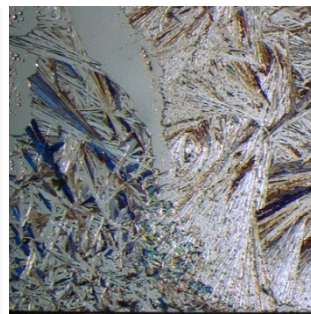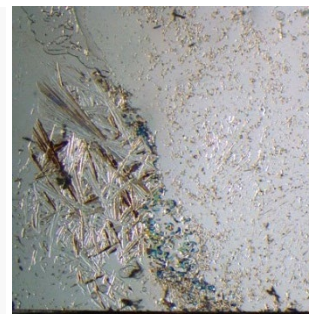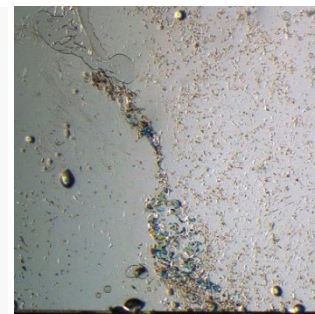

D-2-CH<sub>3</sub> (right)

154.6 °C

165.6 °C

166.4 °C

L-2-Cl (left)

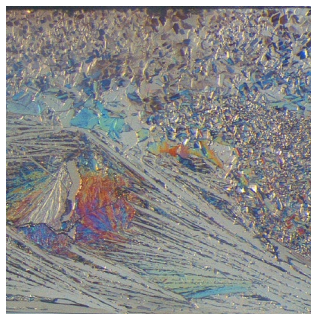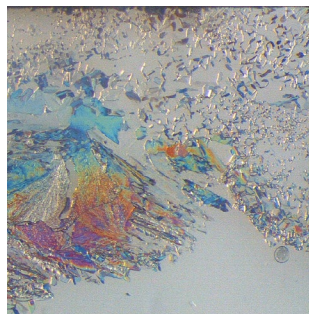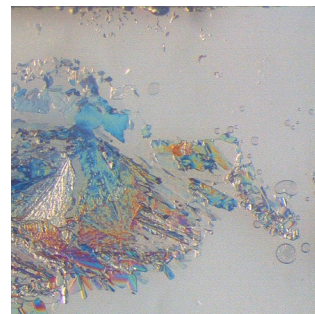

D-2-Cl (right)

118.7 °C

186.0 °C

197.2 °C

## Quasiracemates

D-1-CH<sub>3</sub> (right)

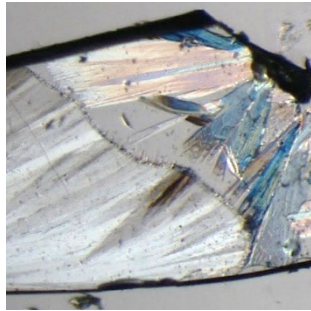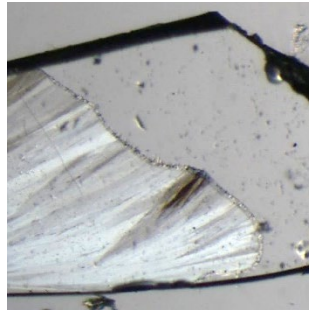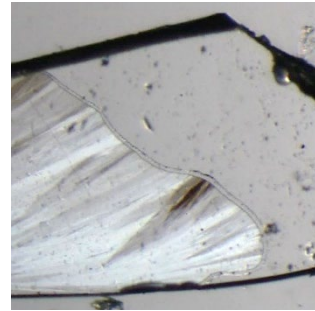

L-1-Cl (left)

115.3 °C

130.7 °C

153.0 °C

L-2-CH<sub>3</sub> (left)

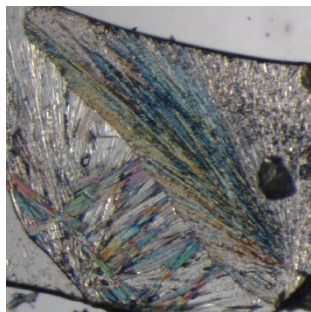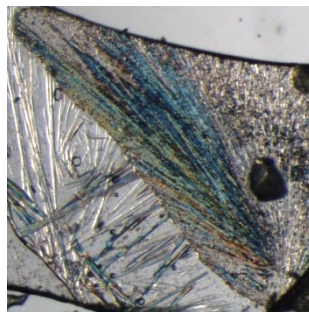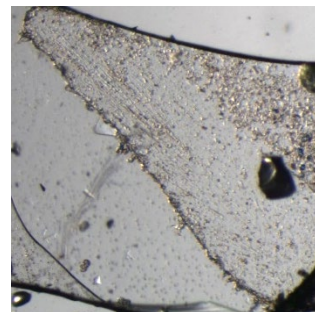

D-2-Cl (right)

138.4 °C

152.8 °C

162.0 °C

L-1-CH<sub>3</sub> (left)

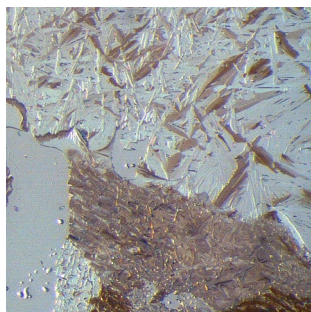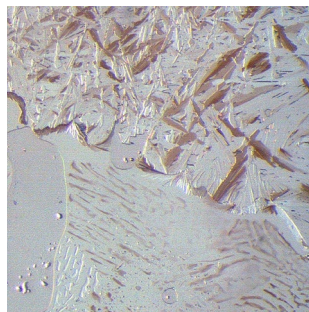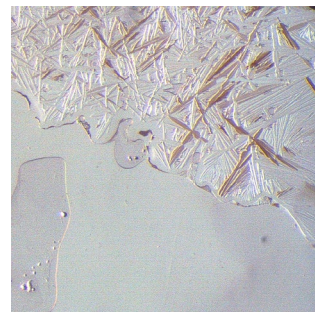

D-2-CH<sub>3</sub> (right)

116.7 °C

140.6 °C

145.0 °C

L-1-Cl (left)

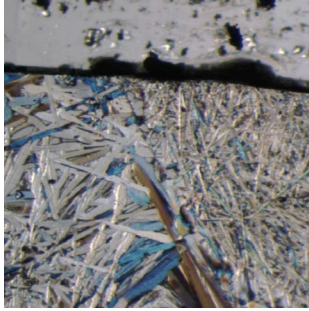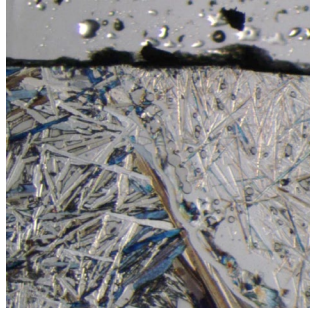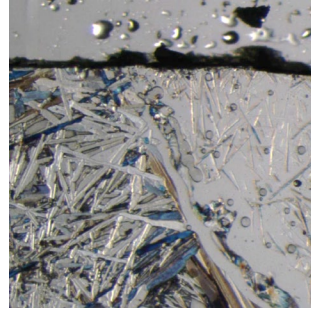

D-2-Cl (right)

116.7 °C

140.6 °C

145.0 °C

L-1-CH<sub>3</sub> (left)

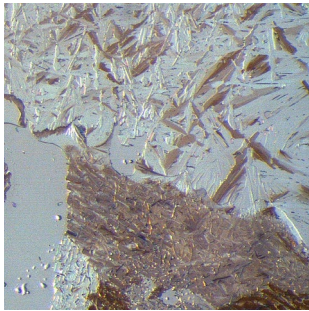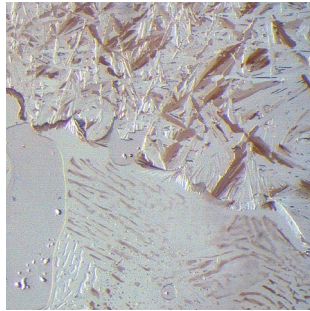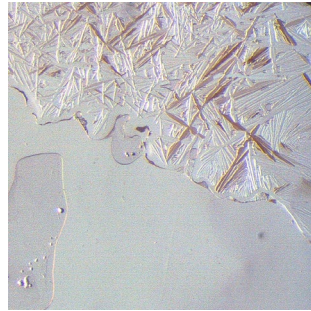

D-2-Cl (right)

116.7 °C

140.6 °C

145.0 °C

L-1-Cl (left)

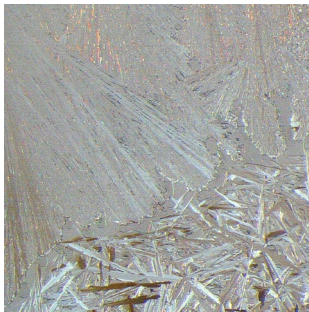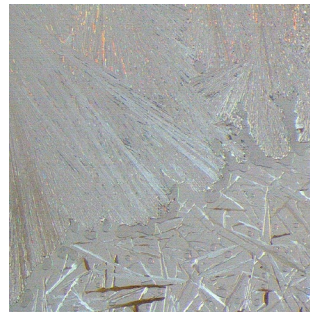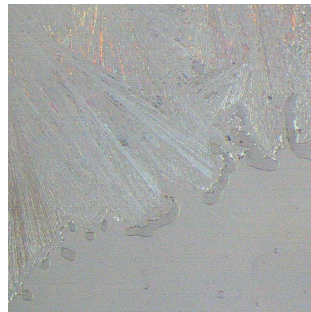

D-2-CH<sub>3</sub> (right)

99.7 °C

142.7 °C

153.7 °C



## H/CF<sub>3</sub> System

### Racemic Mixtures

L-1-H (left)

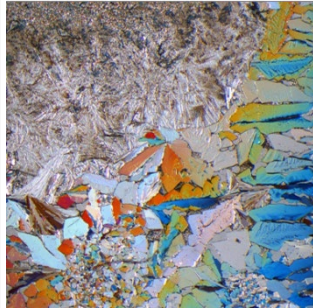

63.3 °C

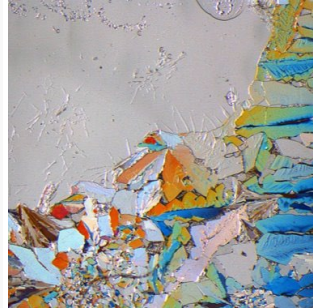

80.9 °C

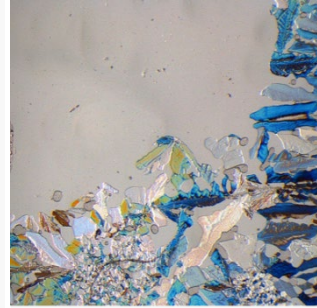

129.0 °C

D-1-H (right)

L-1-CF<sub>3</sub> (top)

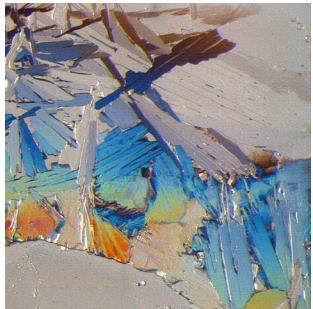

98.7 °C

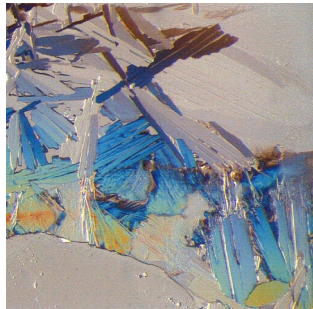

150.9 °C

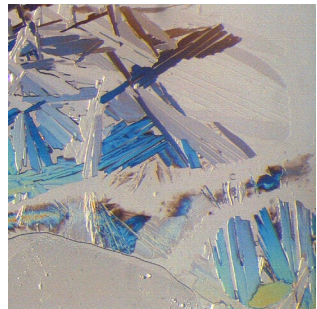

162.8 °C

D-1-CF<sub>3</sub> (bottom)

L-2-H (left)

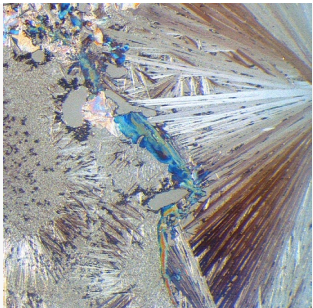

69.2 °C

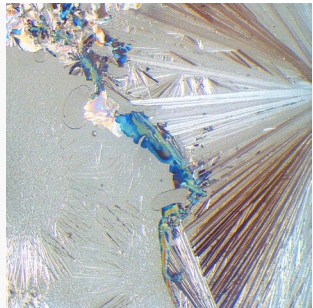

103.9 °C

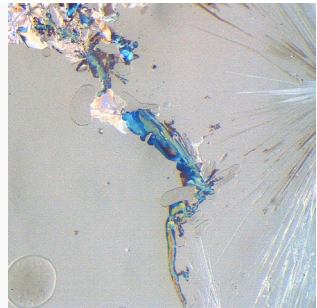

137.3 °C

D-2-H (right)

L-2-CF<sub>3</sub> (left)

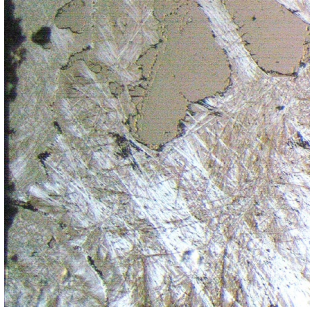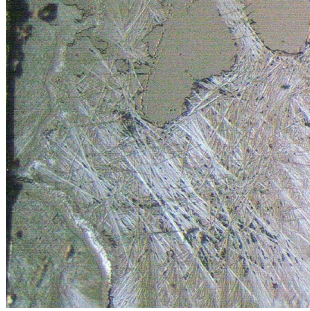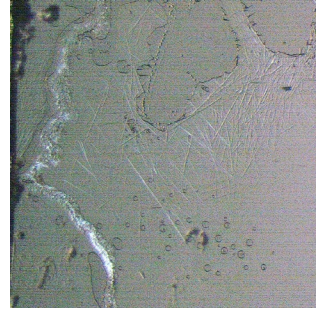

D-2-CF<sub>3</sub> (right)

148.4 °C

178.9 °C

189.0 °C

### Quasiracemates

L-1-CF<sub>3</sub> (top)

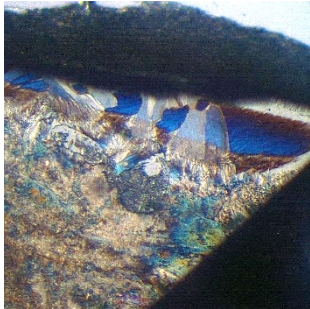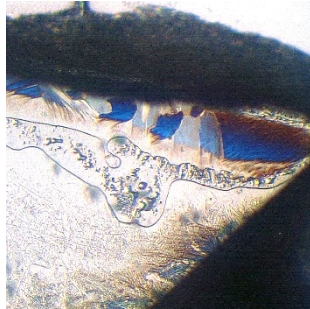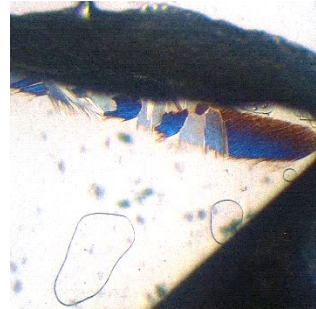

D-1-H (bottom)

40.2 °C

80.9 °C

98.0 °C

L-2-H (left)

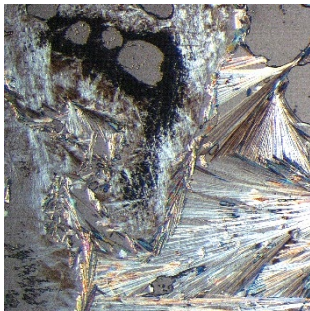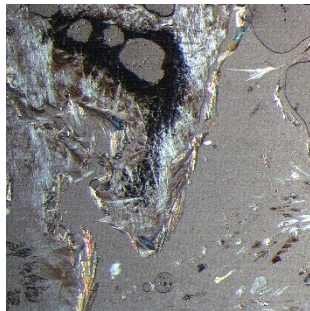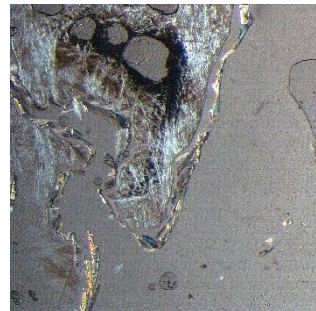

D-2-CF<sub>3</sub> (right)

111.7 °C

132.2 °C

145.0 °C

L-1-H (left)

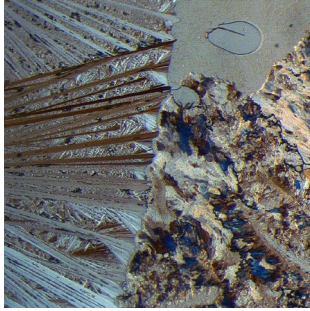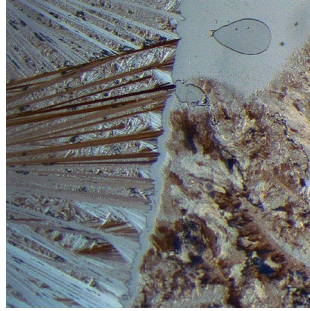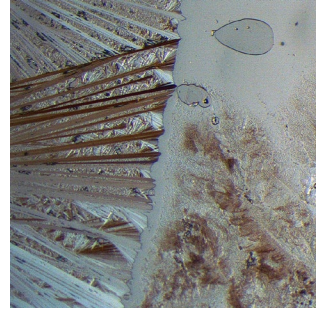

D-2-H (right)

41.0 °C

75.2 °C

80.2 °C

L-1-CF<sub>3</sub> (left)

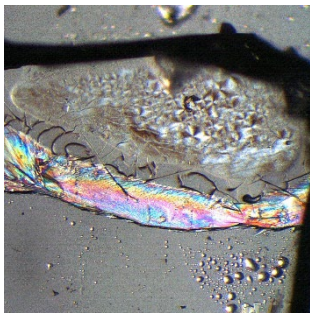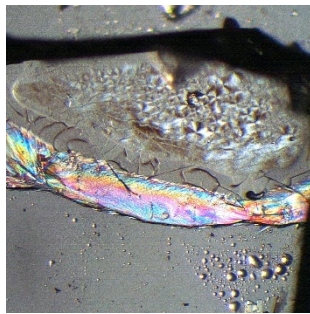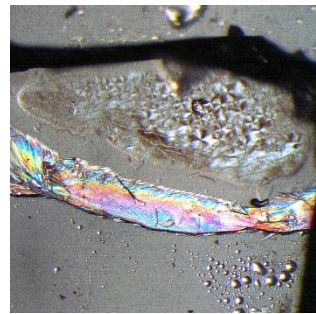

D-2-CF<sub>3</sub> (right)

124.7 °C

144.8 °C

169.6 °C

L-1-H (bottom)

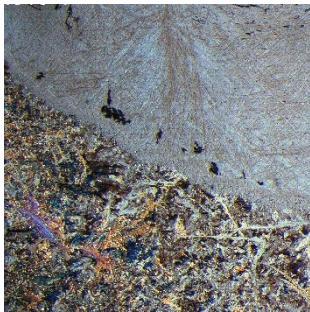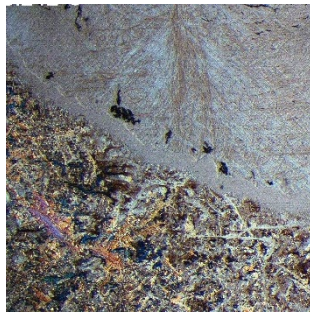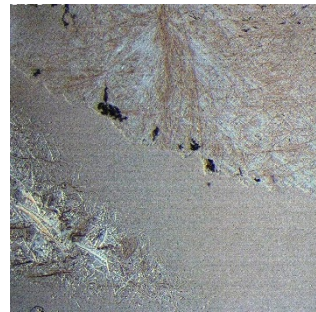

D-2-CF<sub>3</sub> (top)

39.8 °C

63.2 °C

88.6 °C

D-2-H (top)

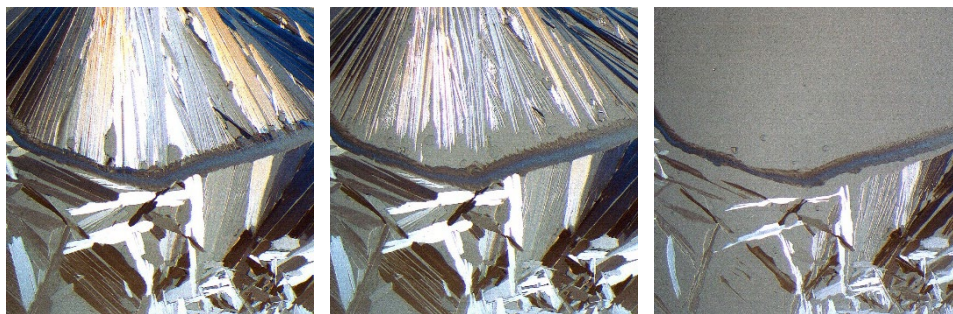

L-1-CF<sub>3</sub> (bottom)

124.7 °C

144.8 °C

169.6 °C

### SI 3. Crystallographic Data

Crystallographic details for each benzoyl amino acid racemate and quasiracemate are summarized in Table S1. X-ray data were collected on a Bruker Venture D8 diffractometer using phi and omega scans with graphite monochromatic  $\text{CuK}\alpha$  ( $\lambda = 1.54178 \text{ \AA}$ ) radiation. Data sets were corrected for Lorentz and polarization effects as well as absorption. The criterion for observed reflections is  $I > 2\sigma(I)$ . Lattice parameters were determined from least-squares analysis and reflection data. Empirical absorption corrections were applied using SADABS<sup>2</sup>. Structures were solved by direct methods and refined by full-matrix least-squares analysis on  $F^2$  using OLEX2<sup>3</sup> equipped with SHELXT<sup>4</sup>. All non-hydrogen atoms were refined anisotropically by full-matrix least-squares on  $F^2$  using the SHELXL<sup>5</sup> program. H atoms (for NH and OH) were located in difference Fourier synthesis and refined isotropically with independent N-H and O-H distances or restrained to  $0.85(2) \text{ \AA}$ . The remaining H atoms were included in idealized geometric positions with  $U_{iso}=1.2U_{eq}$  of the atom to which they were attached ( $U_{iso}=1.5U_{eq}$  for methyl groups). Molecular configurations were compared to the known chirality of the amino acid starting material and estimated Flack parameters<sup>6,7</sup>. Where applicable, atomic coordinates were inverted to achieve correct structural configurations. Hydrogen bond parameters are given in Table S2.

Table S1. Crystallographic Data for Racemic and Quasiracemic Leucine **1** and Phenylalanine **2**.

|                                                                            | (±)- <b>1</b> -CH <sub>3</sub>                  | (±)- <b>1</b> -Cl                                 | (±)- <b>2</b> -CH <sub>3</sub>                  | (±)- <b>2</b> -Cl                                 |
|----------------------------------------------------------------------------|-------------------------------------------------|---------------------------------------------------|-------------------------------------------------|---------------------------------------------------|
| Crystal data                                                               |                                                 |                                                   |                                                 |                                                   |
| CCDC deposit no.                                                           | 2312799                                         | 2312800                                           | 2312801                                         | 2312802                                           |
| Empirical formula                                                          | C <sub>14</sub> H <sub>19</sub> NO <sub>3</sub> | C <sub>13</sub> H <sub>16</sub> ClNO <sub>3</sub> | C <sub>17</sub> H <sub>17</sub> NO <sub>3</sub> | C <sub>16</sub> H <sub>14</sub> ClNO <sub>3</sub> |
| Crystal System, space group                                                | Monoclinic<br><i>P2<sub>1</sub>/c</i> (no. 14)  | Monoclinic<br><i>P2<sub>1</sub>/c</i> (no. 14)    | Monoclinic<br><i>P2<sub>1</sub>/n</i> (no. 14)  | Monoclinic<br><i>P2<sub>1</sub>/c</i> (no. 14)    |
| <i>M<sub>r</sub></i>                                                       | 249.31                                          | 269.72                                            | 283.31                                          | 303.73                                            |
| <i>a</i> , Å                                                               | 8.4622(7)                                       | 8.5014(4)                                         | 10.8048(5)                                      | 10.9337(3)                                        |
| <i>b</i> , Å                                                               | 17.4106(13)                                     | 16.7568(8)                                        | 10.1624(5)                                      | 9.8520(3)                                         |
| <i>c</i> , Å                                                               | 10.0167(7)                                      | 10.0698(5)                                        | 14.3028(6)                                      | 14.5888(5)                                        |
| $\alpha$ , deg                                                             | 90                                              | 90                                                | 90                                              | 90                                                |
| $\beta$ , deg                                                              | 109.344(5)                                      | 105.680(3)                                        | 110.088(2)                                      | 111.998(2)                                        |
| $\gamma$ , deg                                                             | 90                                              | 90                                                | 90                                              | 90                                                |
| <i>V</i> , (Å <sup>3</sup> )                                               | 1392.47(19)                                     | 1381.12(12)                                       | 1474.95(12)                                     | 1457.08(8)                                        |
| <i>Z</i> , <i>Z'</i>                                                       | 4, 1                                            | 4, 1                                              | 4, 1                                            | 4, 1                                              |
| <i>D<sub>calc</sub></i> (g cm <sup>-3</sup> )                              | 1.189                                           | 1.297                                             | 1.276                                           | 1.385                                             |
| $\mu$ (mm <sup>-1</sup> ), Cu <i>K</i> $\alpha$                            | 0.677                                           | 2.463                                             | 0.712                                           | 2.408                                             |
| <i>F</i> <sub>000</sub>                                                    | 537                                             | 568                                               | 600                                             | 632                                               |
| temp (K)                                                                   | 100(2)                                          | 100(2)                                            | 100(2)                                          | 100(2)                                            |
| Crystal form, color                                                        | plate, colorless                                | needle, colorless                                 | block, colorless                                | plate, colorless                                  |
| Crystal size, mm                                                           | 0.31x0.18x0.09                                  | 0.24x0.04x0.03                                    | 0.21x0.18x0.07                                  | 0.19x0.07x0.02                                    |
| Data collection                                                            |                                                 |                                                   |                                                 |                                                   |
| Diffractometer                                                             | Bruker Venture D8<br>CCD                        | Bruker Venture D8<br>CCD                          | Bruker Venture D8<br>CCD                        | Bruker Venture D8<br>CCD                          |
| <i>T</i> <sub>min</sub> / <i>T</i> <sub>max</sub>                          | 0.754/0.625                                     | 0.753/0.556                                       | 0.754/0.683                                     | 0.754/0.637                                       |
| No. of refls. (meas.,<br>uniqu., and obs.)                                 | 27050/2753/1945                                 | 17953/2515/1936                                   | 33896/2907/2782                                 | 27695/2870/2572                                   |
| <i>R</i> <sub>int</sub>                                                    | 0.1046                                          | 0.0793                                            | 0.0274                                          | 0.0388                                            |
| $\vartheta$ <sub>max</sub> (°)                                             | 72.39                                           | 68.24                                             | 72.136                                          | 72.186                                            |
| Refinement                                                                 |                                                 |                                                   |                                                 |                                                   |
| <i>R</i> / <i>R</i> <sup>2</sup> <sub><math>\omega</math></sub> (obs data) | 0.0559/0.1299                                   | 0.0607/0.1426                                     | 0.0327/0.0795                                   | 0.0284/0.0670                                     |
| <i>R</i> / <i>R</i> <sup>2</sup> <sub><math>\omega</math></sub> (all data) | 0.0897/0.1522                                   | 0.0821/0.1567                                     | 0.0341/0.0806                                   | 0.0329/0.0695                                     |
| <i>S</i>                                                                   | 1.062                                           | 1.064                                             | 1.046                                           | 1.059                                             |
| No. of refls.                                                              | 2753                                            | 2515                                              | 2907                                            | 2870                                              |
| No. of parameters                                                          | 172                                             | 171                                               | 197                                             | 196                                               |
| $\Delta\rho_{\max/\min}$ (e·Å <sup>-3</sup> )                              | 0.441/-0.381                                    | 0.456/-0.327                                      | 0.297/-0.198                                    | 0.264/-0.211                                      |
| <i>flack</i>                                                               | -                                               | -                                                 | -                                               | -                                                 |

Table S1. Crystallographic Data for Racemic and Quasiracemic Leucine **1** and Phenylalanine **2**. (cont)

|                                                                            | D- <b>1</b> -CH <sub>3</sub> /L- <b>1</b> -Cl                   | D- <b>2</b> -CH <sub>3</sub> /L- <b>2</b> -Cl                   | L- <b>1</b> -CH <sub>3</sub> /D- <b>2</b> -CH <sub>3</sub>    | D- <b>1</b> -Cl/L- <b>2</b> -Cl                                               |
|----------------------------------------------------------------------------|-----------------------------------------------------------------|-----------------------------------------------------------------|---------------------------------------------------------------|-------------------------------------------------------------------------------|
| Crystal data                                                               |                                                                 |                                                                 |                                                               |                                                                               |
| CCDC deposit no.                                                           | 2312803                                                         | 2312804                                                         | 2312805                                                       | 2312806                                                                       |
| Empirical formula                                                          | C <sub>27</sub> H <sub>35</sub> ClN <sub>2</sub> O <sub>6</sub> | C <sub>33</sub> H <sub>31</sub> ClN <sub>2</sub> O <sub>6</sub> | C <sub>31</sub> H <sub>36</sub> N <sub>2</sub> O <sub>6</sub> | C <sub>29</sub> H <sub>30</sub> Cl <sub>2</sub> N <sub>2</sub> O <sub>6</sub> |
| Crystal System, space group                                                | Monoclinic<br><i>P</i> 2 <sub>1</sub> (no. 4)                   | Monoclinic<br><i>P</i> 2 <sub>1</sub> (no. 4)                   | Monoclinic<br><i>P</i> 2 <sub>1</sub> (no. 4)                 | Monoclinic<br><i>P</i> 2 <sub>1</sub> (no. 4)                                 |
| <i>M<sub>r</sub></i>                                                       | 519.02                                                          | 587.05                                                          | 532.62                                                        | 573.45                                                                        |
| <i>a</i> , Å                                                               | 8.5052(3)                                                       | 10.8824(6)                                                      | 10.6827(8)                                                    | 10.7438(4)                                                                    |
| <i>b</i> , Å                                                               | 16.9899(7)                                                      | 10.0217(6)                                                      | 9.9438(8)                                                     | 9.7103(3)                                                                     |
| <i>c</i> , Å                                                               | 10.0551(4)                                                      | 14.4325(8)                                                      | 14.4410(11)                                                   | 14.4644(5)                                                                    |
| $\alpha$ , deg                                                             | 90                                                              | 90                                                              | 90                                                            | 90                                                                            |
| $\beta$ , deg                                                              | 107.507(2)                                                      | 111.003(2)                                                      | 110.660(3)                                                    | 110.923(2)                                                                    |
| $\gamma$ , deg                                                             | 90                                                              | 90                                                              | 90                                                            | 90                                                                            |
| <i>V</i> , (Å <sup>3</sup> )                                               | 1385.68(9)                                                      | 1469.44(15)                                                     | 1435.37(19)                                                   | 1409.50(9)                                                                    |
| <i>Z</i> , <i>Z'</i>                                                       | 2, 1                                                            | 2, 1                                                            | 2, 1                                                          | 2, 1                                                                          |
| <i>D<sub>calc</sub></i> (g cm <sup>-3</sup> )                              | 1.244                                                           | 1.327                                                           | 1.232                                                         | 1.351                                                                         |
| $\mu$ (mm <sup>-1</sup> ), Cu <i>K</i> $\alpha$                            | 1.567                                                           | 1.551, Cu <i>K</i> $\alpha$                                     | 0.694                                                         | 2.451                                                                         |
| <i>F</i> <sub>000</sub>                                                    | 552                                                             | 616                                                             | 568                                                           | 600                                                                           |
| temp (K)                                                                   | 100(2)                                                          | 100(2)                                                          | 100(2)                                                        | 100(2)                                                                        |
| Crystal form, color                                                        | needle, colorless                                               | block, colorless                                                | plate, colorless                                              | needle, colorless                                                             |
| Crystal size, mm                                                           | 0.39x0.07x0.04                                                  | 0.50 x 0.20 x 0.18                                              | 0.23x0.21x0.09                                                | 0.49x0.08x0.05                                                                |
| Data collection                                                            |                                                                 |                                                                 |                                                               |                                                                               |
| Diffractometer                                                             | Bruker Venture D8<br>CCD                                        | Bruker Venture D8<br>CCD                                        | Bruker Venture D8<br>CCD                                      | Bruker Venture D8<br>CCD                                                      |
| <i>T</i> <sub>min</sub> / <i>T</i> <sub>max</sub>                          | 0.753/0.603                                                     | 0.754/0.6355                                                    | 0.754/0.632                                                   | 0.754/0.634                                                                   |
| No. of refls. (meas.,<br>uniqu., and obs.)                                 | 24521/5041/4819                                                 | 35012/5686/5610                                                 | 24786/5455/5281                                               | 28644/5253/4917                                                               |
| <i>R</i> <sub>int</sub>                                                    | 0.0335                                                          | 0.0369                                                          | 0.0306                                                        | 0.0486                                                                        |
| $\vartheta$ <sub>max</sub> (°)                                             | 68.339                                                          | 72.079                                                          | 72.271                                                        | 70.073                                                                        |
| Refinement                                                                 |                                                                 |                                                                 |                                                               |                                                                               |
| <i>R</i> / <i>R</i> <sup>2</sup> <sub><math>\omega</math></sub> (obs data) | 0.0354/0.0938                                                   | 0.0363/0.0959                                                   | 0.0364/0.0988                                                 | 0.0278/0.0638                                                                 |
| <i>R</i> / <i>R</i> <sup>2</sup> <sub><math>\omega</math></sub> (all data) | 0.0373/0.0955                                                   | 0.0359/0.0962                                                   | 0.0378/0.1003                                                 | 0.0315/0.0658                                                                 |
| <i>S</i>                                                                   | 1.046                                                           | 1.068                                                           | 1.052                                                         | 1.040                                                                         |
| No. of refls.                                                              | 5045                                                            | 5686                                                            | 5455                                                          | 5253                                                                          |
| No. of parameters                                                          | 342                                                             | 392                                                             | 368                                                           | 366                                                                           |
| $\Delta\rho$ <sub>max/min</sub> (e·Å <sup>-3</sup> )                       | 0.253/-0.199                                                    | 0.350/-0.346                                                    | 0.476/-0.216                                                  | 0.198/-0.211                                                                  |
| <i>flack</i>                                                               | 0.108(5)                                                        | 0.123(6)                                                        | 0.10(6)                                                       | 0.050(6)                                                                      |

Table S1. Crystallographic Data for Racemic and Quasiracemic Leucine **1** and Phenylalanine **2**. (cont)

|                                                                            | D- <b>1</b> -CH <sub>3</sub> /L- <b>2</b> -Cl                   | D- <b>1</b> -Cl/L- <b>2</b> -CH <sub>3</sub>                    |
|----------------------------------------------------------------------------|-----------------------------------------------------------------|-----------------------------------------------------------------|
| Crystal data                                                               |                                                                 |                                                                 |
| CCDC deposit no.                                                           | 2312807                                                         | 2312808                                                         |
| Empirical formula                                                          | C <sub>30</sub> H <sub>33</sub> ClN <sub>2</sub> O <sub>6</sub> | C <sub>30</sub> H <sub>33</sub> ClN <sub>2</sub> O <sub>6</sub> |
| Crystal System, space group                                                | Monoclinic<br><i>P</i> 2 <sub>1</sub> (no. 4)                   | Monoclinic<br><i>P</i> 2 <sub>1</sub> (no. 4)                   |
| <i>M<sub>r</sub></i>                                                       | 553.03                                                          | 553.03                                                          |
| <i>a</i> , Å                                                               | 10.7599(5)                                                      | 10.7094(3)                                                      |
| <i>b</i> , Å                                                               | 9.7943(5)                                                       | 9.8205(3)                                                       |
| <i>c</i> , Å                                                               | 14.5273(6)                                                      | 14.5002(4)                                                      |
| $\alpha$ , deg                                                             | 90                                                              | 90                                                              |
| $\beta$ , deg                                                              | 111.649(2)                                                      | 111.2860(1)                                                     |
| $\gamma$ , deg                                                             | 90                                                              | 90                                                              |
| <i>V</i> , (Å <sup>3</sup> )                                               | 1422.98(9)                                                      | 1420.97(7)                                                      |
| <i>Z</i> , <i>Z'</i>                                                       | 2, 1                                                            | 2, 1                                                            |
| <i>D<sub>calc</sub></i> (g cm <sup>-3</sup> )                              | 1.291                                                           | 1.293                                                           |
| $\mu$ (mm <sup>-1</sup> ), Cu <i>K</i> $\alpha$                            | 1.564                                                           | 1.566                                                           |
| <i>F</i> <sub>000</sub>                                                    | 584                                                             | 584                                                             |
| temp (K)                                                                   | 100(2)                                                          | 100(2)                                                          |
| Crystal form, color                                                        | plate, colorless                                                | needle, colorless                                               |
| Crystal size, mm                                                           | 0.13x0.12x0.05                                                  | 0.49x0.08x0.05                                                  |
| Data collection                                                            |                                                                 |                                                                 |
| Diffractometer                                                             | Bruker Venture D8<br>CCD                                        | Bruker Venture D8<br>CCD                                        |
| <i>T</i> <sub>min</sub> / <i>T</i> <sub>max</sub>                          | 0.754/0.634                                                     | 0.754/0.634                                                     |
| No. of refls. (meas.,<br>uniqu., and obs.)                                 | 47892/5386/4855                                                 | 31726/5553/5264                                                 |
| <i>R</i> <sub>int</sub>                                                    | 0.0739                                                          | 0.0409                                                          |
| $\vartheta$ <sub>max</sub> (°)                                             | 72.240                                                          | 72.206                                                          |
| Refinement                                                                 |                                                                 |                                                                 |
| <i>R</i> / <i>R</i> <sup>2</sup> <sub><math>\omega</math></sub> (obs data) | 0.0380/0.0801                                                   | 0.0282/0.0693                                                   |
| <i>R</i> / <i>R</i> <sup>2</sup> <sub><math>\omega</math></sub> (all data) | 0.0465/0.0838                                                   | 0.0305/0.0706                                                   |
| <i>S</i>                                                                   | 1.047                                                           | 1.048                                                           |
| No. of refls.                                                              | 5386                                                            | 5553                                                            |
| No. of parameters                                                          | 367                                                             | 368                                                             |
| $\Delta\rho_{\max/\min}$ (e·Å <sup>-3</sup> )                              | 0.199/-0.236                                                    | 0.170/-0.188                                                    |
| <i>flack</i>                                                               | 0.056(8)                                                        | 0.012(5)                                                        |

Table S1. Crystallographic Data for Racemic and Quasiracemic Leucine **1** and Phenylalanine **2**. (cont)

|                                                                            | (±)- <b>1</b> -H                                          | (±)- <b>1</b> -CF <sub>3</sub>                                 | (±)- <b>2</b> -H                                          | D- <b>2</b> -H/L- <b>2</b> -CF <sub>3</sub>                                  |
|----------------------------------------------------------------------------|-----------------------------------------------------------|----------------------------------------------------------------|-----------------------------------------------------------|------------------------------------------------------------------------------|
| Crystal data                                                               |                                                           |                                                                |                                                           |                                                                              |
| CCDC deposit no.                                                           | 2312809                                                   | 2312810                                                        | 2312811                                                   | 2312812                                                                      |
| Empirical formula                                                          | C <sub>13</sub> H <sub>17</sub> NO <sub>3</sub>           | C <sub>14</sub> H <sub>16</sub> F <sub>3</sub> NO <sub>3</sub> | C <sub>16</sub> H <sub>15</sub> NO <sub>3</sub>           | C <sub>33</sub> H <sub>29</sub> F <sub>3</sub> N <sub>2</sub> O <sub>6</sub> |
| Crystal System, space group                                                | Monoclinic<br><i>P</i> 2 <sub>1</sub> / <i>c</i> (no. 14) | Monoclinic<br><i>P</i> 2 <sub>1</sub> / <i>c</i> (no. 14)      | Monoclinic<br><i>P</i> 2 <sub>1</sub> / <i>c</i> (no. 14) | Monoclinic<br><i>P</i> 2 <sub>1</sub> (no. 4)                                |
| <i>M<sub>r</sub></i>                                                       | 235.27                                                    | 303.28                                                         | 269.29                                                    | 606.58                                                                       |
| <i>a</i> , Å                                                               | 10.7023(4)                                                | 8.9660(4)                                                      | 11.2259(5)                                                | 12.9498(11)                                                                  |
| <i>b</i> , Å                                                               | 9.0828(3)                                                 | 17.0296(7)                                                     | 9.0079(4)                                                 | 9.6063(8)                                                                    |
| <i>c</i> , Å                                                               | 13.3370(5)                                                | 10.371(4)                                                      | 14.0101(6)                                                | 13.1925(11)                                                                  |
| $\alpha$ , deg                                                             | 90                                                        | 90                                                             | 90                                                        | 90                                                                           |
| $\beta$ , deg                                                              | 103.692(2)                                                | 107.371(2)                                                     | 107.097(1)                                                | 117.118(3)                                                                   |
| $\gamma$ , deg                                                             | 90                                                        | 90                                                             | 90                                                        | 90                                                                           |
| <i>V</i> , (Å <sup>3</sup> )                                               | 1259.61(8)                                                | 1467.64(11)                                                    | 1354.12(10)                                               | 1460.7(2)                                                                    |
| <i>Z</i> , <i>Z'</i>                                                       | 4, 1                                                      | 4, 1                                                           | 4, 1                                                      | 2, 1                                                                         |
| <i>D<sub>calc</sub></i> (g cm <sup>-3</sup> )                              | 1.241                                                     | 1.373                                                          | 1.321                                                     | 1.379                                                                        |
| $\mu$ (mm <sup>-1</sup> ), Cu <i>K</i> $\alpha$                            | 0.719                                                     | 1.049                                                          | 0.748                                                     | 0.910                                                                        |
| <i>F</i> <sub>000</sub>                                                    | 504                                                       | 632                                                            | 568                                                       | 632                                                                          |
| temp (K)                                                                   | 100(2)                                                    | 100(2)                                                         | 100(2)                                                    | 100(2)                                                                       |
| Crystal form, color                                                        | plate, colorless                                          | plate, colorless                                               | block, colorless                                          | prism, colorless                                                             |
| Crystal size, mm                                                           | 0.38x0.18x0.12                                            | 0.38x0.14x0.03                                                 | 0.20x0.15x0.05                                            | 0.44x0.33x0.06                                                               |
| Data collection                                                            |                                                           |                                                                |                                                           |                                                                              |
| Diffractometer                                                             | Bruker Venture D8<br>CCD                                  | Bruker Venture D8<br>CCD                                       | Bruker Venture D8<br>CCD                                  | Bruker Venture D8<br>CCD                                                     |
| <i>T</i> <sub>min</sub> / <i>T</i> <sub>max</sub>                          | 0.753/0.648                                               | 0.753/0.625                                                    | 0.753/0.676                                               | 0.753/0.639                                                                  |
| No. of refls. (meas.,<br>uniqu., and obs.)                                 | 25092/2483/2277                                           | 22194/2684/2317                                                | 23025/2643/2616                                           | 24713/5234/5093                                                              |
| <i>R</i> <sub>int</sub>                                                    | 0.0350                                                    | 0.0445                                                         | 0.0255                                                    | 0.0292                                                                       |
| $\vartheta$ <sub>max</sub> (°)                                             | 72.239                                                    | 68.411                                                         | 72.250                                                    | 68.317                                                                       |
| Refinement                                                                 |                                                           |                                                                |                                                           |                                                                              |
| <i>R</i> / <i>R</i> <sup>2</sup> <sub><math>\omega</math></sub> (obs data) | 0.0356/0.0892                                             | 0.0600/0.1175                                                  | 0.0321/0.0791                                             | 0.0261/0.0659                                                                |
| <i>R</i> / <i>R</i> <sup>2</sup> <sub><math>\omega</math></sub> (all data) | 0.0356/0.0921                                             | 0.0704/0.1238                                                  | 0.0324/0.0794                                             | 0.0273/0.0671                                                                |
| <i>S</i>                                                                   | 1.045                                                     | 1.045                                                          | 1.037                                                     | 1.091                                                                        |
| No. of refls.                                                              | 2483                                                      | 2484                                                           | 2643                                                      | 5234                                                                         |
| No. of parameters                                                          | 162                                                       | 256                                                            | 187                                                       | 409                                                                          |
| $\Delta\rho$ <sub>max/min</sub> (e·Å <sup>-3</sup> )                       | 0.236/-0.233                                              | 0.174/-0.196                                                   | 0.316/-0.202                                              | 0.183/-0.205                                                                 |
| <i>flack</i>                                                               | -                                                         | -                                                              | -                                                         | 0.15(4)                                                                      |



Table S1. Crystallographic Data for Racemic and Quasiracemic Leucine **1** and Phenylalanine **2**. (cont)

|                                                                            | L-1-H/D-2-H                                                   | D-1-CF <sub>3</sub> /L-2-CF <sub>3</sub>                                     | D-1-CF <sub>3</sub> /L-2-H                                                   |
|----------------------------------------------------------------------------|---------------------------------------------------------------|------------------------------------------------------------------------------|------------------------------------------------------------------------------|
| Crystal data                                                               |                                                               |                                                                              |                                                                              |
| CCDC deposit no.                                                           | 2312813                                                       | 2312814                                                                      | 2312815                                                                      |
| Empirical formula                                                          | C <sub>29</sub> H <sub>32</sub> N <sub>2</sub> O <sub>6</sub> | C <sub>31</sub> H <sub>30</sub> F <sub>6</sub> N <sub>2</sub> O <sub>6</sub> | C <sub>30</sub> H <sub>31</sub> F <sub>3</sub> N <sub>2</sub> O <sub>6</sub> |
| Crystal System, space group                                                | Monoclinic<br><i>P</i> 2 <sub>1</sub> (no. 4)                 | Monoclinic<br><i>P</i> 2 <sub>1</sub> (no. 4)                                | Monoclinic<br><i>P</i> 2 <sub>1</sub> (no. 4)                                |
| <i>M</i> <sub>r</sub>                                                      | 504.56                                                        | 640.57                                                                       | 572.57                                                                       |
| <i>a</i> , Å                                                               | 10.9173(3)                                                    | 13.8243(8)                                                                   | 11.4316(8)                                                                   |
| <i>b</i> , Å                                                               | 9.1344(6)                                                     | 9.1832(5)                                                                    | 9.5763(6)                                                                    |
| <i>c</i> , Å                                                               | 14.1599(10)                                                   | 13.8585(8)                                                                   | 14.2272(10)                                                                  |
| $\alpha$ , deg                                                             | 90                                                            | 90                                                                           | 90                                                                           |
| $\beta$ , deg                                                              | 108.014(2)                                                    | 117.871(3)                                                                   | 111.456(3)                                                                   |
| $\gamma$ , deg                                                             | 90                                                            | 90                                                                           | 90                                                                           |
| <i>V</i> , (Å <sup>3</sup> )                                               | 1342.85(16)                                                   | 1555.27(16)                                                                  | 1449.55(17)                                                                  |
| <i>Z</i> , <i>Z'</i>                                                       | 2, 1                                                          | 2, 1                                                                         | 2, 1                                                                         |
| <i>D</i> <sub>calc</sub> (g cm <sup>-3</sup> )                             | 1.248                                                         | 1.368                                                                        | 1.312                                                                        |
| $\mu$ (mm <sup>-1</sup> ), rad. type                                       | 0.715                                                         | 1.024                                                                        | 0.880                                                                        |
| <i>F</i> <sub>000</sub>                                                    | 536                                                           | 536                                                                          | 600                                                                          |
| temp (K)                                                                   | 100(2)                                                        | 100(2)                                                                       | 100(2)                                                                       |
| Crystal form, color                                                        | block, colorless                                              | block, colorless                                                             | needle, colorless                                                            |
| Crystal size, mm                                                           | 0.28x0.10x0.03                                                | 0.115x0.15x0.04                                                              | 0.29x0.12x0.08                                                               |
| Data collection                                                            |                                                               |                                                                              |                                                                              |
| Diffractometer                                                             | Bruker Venture D8<br>CCD                                      | Bruker Venture D8<br>CCD                                                     | Bruker Venture D8<br>CCD                                                     |
| <i>T</i> <sub>min</sub> / <i>T</i> <sub>max</sub>                          | 0.753/0.649                                                   | 0.754/0.578                                                                  | 0.754/0.695                                                                  |
| No. of refls. (meas.,<br>uniq., and obs.)                                  | 43830/5446/5380                                               | 20421/6082/5418                                                              | 9928/5688/5522                                                               |
| <i>R</i> <sub>int</sub>                                                    | 0.0230                                                        | 0.0464                                                                       | 0.0345                                                                       |
| $\vartheta$ <sub>max</sub> (°)                                             | 75.007                                                        | 72.859                                                                       | 72.378                                                                       |
| Refinement                                                                 |                                                               |                                                                              |                                                                              |
| <i>R</i> / <i>R</i> <sup>2</sup> <sub><math>\omega</math></sub> (obs data) | 0.0283/0.0776                                                 | 0.0514/0.1253                                                                | 0.0465/0.1151                                                                |
| <i>R</i> / <i>R</i> <sup>2</sup> <sub><math>\omega</math></sub> (all data) | 0.0286/0.0781                                                 | 0.0602/0.1332                                                                | 0.0479/0.1167                                                                |
| <i>S</i>                                                                   | 1.036                                                         | 1.130                                                                        | 1.191                                                                        |
| No. of refls.                                                              | 5446                                                          | 6082                                                                         | 5688                                                                         |
| No. of parameters                                                          | 378                                                           | 475                                                                          | 426                                                                          |
| $\Delta\rho$ <sub>max/min</sub> (e·Å <sup>-3</sup> )                       | 0.243/-0.166                                                  | 0.403/-0.326                                                                 | 0.735/-0.602                                                                 |
| <i>flack</i>                                                               | 0.07(4)                                                       | 0.06(7)                                                                      | 0.07(3)                                                                      |

Table S2. Hydrogen-Bond Parameters for Leucine/Phenylalanine Racemic and Quasiracemic Crystal Structures.

| Compound                                 | Hydrogen Bond Type | D-H...A       | D-H (Å)   | H...A (Å) | D...A (Å)  | D-H...A (°) | Symmetry operator   |
|------------------------------------------|--------------------|---------------|-----------|-----------|------------|-------------|---------------------|
| (±)-1-CH <sub>3</sub>                    | II                 | O2-H2...O3    | 0.91(3)   | 1.74(3)   | 2.641(2)   | 172(3)      | 1-x, -y, 1-z        |
|                                          |                    | N1-H1...O1    | 0.81(3)   | 2.15(3)   | 2.642(2)   | 166(2)      | x, 0.5-y, z-0.5     |
| (±)-1-Cl                                 | II                 | O2-H2...O3    | 0.92(4)   | 1.71(4)   | 2.619(3)   | 167(4)      | 1-x, -y, 1-z        |
|                                          |                    | N1-H1...O1    | 0.79(4)   | 2.17(4)   | 2.948(3)   | 167(4)      | x, 0.5-y, z-0.5     |
| (±)-2-CH <sub>3</sub>                    | I                  | O2-H2...O1    | 0.906(15) | 1.690(15) | 2.5899(10) | 171.7(13)   | 0.5-x, y-0.5, 0.5-z |
|                                          |                    | N1-H1...O3    | 0.889(14) | 2.134(14) | 3.0084(11) | 167.7(12)   | 1-x, 1-y, 1-z       |
| (±)-2-Cl                                 | I                  | O2-H2...O3    | 0.813(19) | 1.791(19) | 2.6024(13) | 175.7(18)   | 1-x, y-0.5, 0.5-z   |
|                                          |                    | N1-H1...O1    | 0.841(17) | 2.136(17) | 2.9632(14) | 167.7(15)   | 1-x, 1-y, 1-z       |
| D-1-CH <sub>3</sub> /L-1-Cl              | II                 | O2A-H2A...O3B | 0.85(3)   | 1.80(3)   | 2.631(3)   | 166(4)      | x, y, z             |
|                                          |                    | N1A-H1A...O1B | 0.82(2)   | 2.17(3)   | 2.957(3)   | 162(4)      | 1-x, y-0.5, 1-z     |
|                                          |                    | O2B-H2B...O3A | 0.84(3)   | 1.81(3)   | 2.629(3)   | 165(4)      | x, y, z             |
|                                          |                    | N1B-H1B...O1A | 0.82(2)   | 2.12(2)   | 2.931(3)   | 172(4)      | 1-x, 0.5+y, -z      |
| D-2-CH <sub>3</sub> /L-2-Cl              | I                  | O2A-H2A...O3A | 0.90(5)   | 1.69(5)   | 2.591(3)   | 174(4)      | 1-x, -0.5+y, 2-z    |
|                                          |                    | N1A-H1A...O1A | 0.81(4)   | 2.21(4)   | 2.999(3)   | 165(4)      | x, y, z             |
|                                          |                    | O2B-H2B...O3B | 0.83(4)   | 1.78(5)   | 2.598(3)   | 168(4)      | -x, 0.5+y, 1-z      |
|                                          |                    | N1B-H1B...O1B | 0.89(4)   | 2.09(4)   | 2.967(3)   | 168(3)      | x, y, z             |
| L-1-CH <sub>3</sub> /D-2-CH <sub>3</sub> | I                  | O2A-H2A...O3A | 0.90(2)   | 1.69(2)   | 2.583(2)   | 169(3)      | 2-x, 0.5+y, 1-z     |
|                                          |                    | N1A-H1A...O1A | 0.86(2)   | 2.10(2)   | 2.955(2)   | 170(3)      | x, y, z             |
|                                          |                    | O2B-H2B...O3B | 0.85(2)   | 1.77(2)   | 2.621(2)   | 176(4)      | 1-x, -0.5+y, -z     |
|                                          |                    | N1B-H1B...O1B | 0.88(2)   | 2.12(2)   | 2.986(2)   | 170(3)      | x, y, z             |
| D-1-Cl/L-2-Cl                            | I                  | O2A-H2A...O3A | 0.88(4)   | 1.74(4)   | 2.624(3)   | 174(3)      | 1-x, -0.5+y, 2-z    |
|                                          |                    | N1A-H1A...O1A | 0.86(3)   | 2.11(3)   | 2.961(3)   | 171(3)      | x, y, z             |
|                                          |                    | O2B-H2B...O3B | 0.80(4)   | 1.79(4)   | 2.588(3)   | 175(4)      | 1-x, 0.5+y, 1-z     |
|                                          |                    | N1B-H1B...O1B | 0.80(3)   | 2.13(3)   | 2.902(3)   | 163(3)      | x, y, z             |
| D-1-CH <sub>3</sub> /L-2-Cl              | I                  | O2A-H2A...O3A | 0.88(4)   | 1.75(4)   | 2.632(3)   | 177(4)      | 1-x, -0.5+y, 2-z    |
|                                          |                    | N1A-H1A...O1A | 0.86(3)   | 2.09(4)   | 2.947(3)   | 172(3)      | x, y, z             |
|                                          |                    | O2B-H2B...O3B | 0.83(5)   | 1.75(5)   | 2.577(3)   | 175(4)      | 1-x, 0.5+y, 1-z     |
|                                          |                    | N1B-H1B...O1B | 0.83(4)   | 2.12(4)   | 2.936(3)   | 166(4)      | x, y, z             |
| D-1-Cl/L-2-CH <sub>3</sub>               | I                  | O2A-H2A...O3A | 0.84(3)   | 1.78(4)   | 2.615(2)   | 176(3)      | 1-x, 0.5+y, 2-z     |
|                                          |                    | N1A-H1A...O1A | 0.86(3)   | 2.15(3)   | 2.991(2)   | 166(3)      | x, y, z             |
|                                          |                    | O2B-H2B...O3B | 0.86(3)   | 1.74(4)   | 2.597(2)   | 175(3)      | -x, -0.5+y, 1-z     |
|                                          |                    | N1B-H1B...O1B | 0.84(3)   | 2.08(3)   | 2.916(2)   | 174(3)      | x, y, z             |
| (±)-1-H                                  | I                  | O2-H2...O3    | 0.942(17) | 1.649(18) | 2.5882(11) | 174.4(16)   | 1-x, y-0.5, 0.5-z   |
|                                          |                    | N1-H1...O1    | 0.879(15) | 2.031(15) | 2.8884(12) | 164.9(13)   | 1-x, 1-y, 1-z       |
| (±)-1-CF <sub>3</sub>                    | II                 | O2-H2...O3    | 0.879(19) | 1.745(19) | 2.622(2)   | 175(4)      | 1-x, -y, 1-z        |
|                                          |                    | N1-H1...O1    | 0.835(17) | 2.082(18) | 2.909(2)   | 170(2)      | x, 0.5-y, z-0.5     |
| (±)-2-H                                  | I                  | O2-H2...O3    | 0.901(15) | 1.680(15) | 2.5795(10) | 176.3(13)   | 1-x, y-0.5, 0.5-z   |
|                                          |                    | N1-H1...O1    | 0.867(13) | 2.082(14) | 2.8898(11) | 164.7(12)   | 1-x, 1-y, 1-z       |
| D-2-H/L-2-CF <sub>3</sub>                | I                  | O2A-H2A...O3A | 0.87(3)   | 1.72(3)   | 2.576(2)   | 170(3)      | 1-x, -0.5+y, 2-z    |
|                                          |                    | N1A-H1A...O1A | 0.84(3)   | 2.05(3)   | 2.870(2)   | 168(2)      | x, y, z             |
|                                          |                    | O2B-H2B...O3B | 0.92(3)   | 1.77(3)   | 2.681(2)   | 175(3)      | -x, 0.5+y, 1-z      |
|                                          |                    | N1B-H1B...O1B | 0.86(3)   | 2.18(3)   | 2.996(2)   | 159(2)      | x, y, z             |
| D-1-H/L-2-H                              | I                  | O2A-H2A...O3A | 0.94(2)   | 1.65(2)   | 2.5927(18) | 176(2)      | 1-x, 0.5+y, 2-z     |
|                                          |                    | N1A-H1A...O1A | 0.876(17) | 2.044(18) | 2.9080(18) | 168(2)      | x, y, z             |
|                                          |                    | O2B-H2B...O3B | 0.92(2)   | 1.68(2)   | 2.5912(17) | 175(3)      | 1-x, y-0.5, 1-z     |
|                                          |                    | N1B-H1B...O1B | 0.882(17) | 2.057(18) | 2.9122(18) | 163(2)      | x, y, z             |
| L-1-CF <sub>3</sub> /D-2-CF <sub>3</sub> | I (variant)        | O2A-H2A...O3A | 0.88(6)   | 1.71(6)   | 2.585(4)   | 172(5)      | -1-x, -0.5+y, -z    |

|                            |   |               |         |         |          |        |                 |
|----------------------------|---|---------------|---------|---------|----------|--------|-----------------|
| D-1-CF <sub>3</sub> /L-2-H | I | N1A-H1A...O1A | 0.81(5) | 2.12(5) | 2.917(4) | 170(5) | x-1, y-1, z-1   |
|                            |   | O2B-H2B...O3B | 0.74(6) | 1.87(6) | 2.611(4) | 176(6) | 2-x, 0.5+y, 2-z |
|                            |   | N1B-H1B...O1B | 0.92(5) | 2.08(5) | 2.988(4) | 168(4) | 1+x, 1+y, 1+z   |
|                            |   | O2A-H2A...O3A | 0.87(5) | 1.74(5) | 2.598(3) | 171(5) | 1-x, 0.5+y, 1-z |
|                            |   | N1A-H1A...O1A | 0.90(4) | 2.07(4) | 2.956(3) | 167(3) | x, y, z         |
|                            |   | O2B-H2B...O3B | 0.85(5) | 1.76(5) | 2.601(3) | 174(5) | 1-x, 0.5+y, 2-z |
|                            |   | N1B-H1B...O1B | 0.83(4) | 2.10(5) | 2.921(4) | 173(4) | x, y, z         |

Table S3. Intermolecular Aryl...Aryl Contact Parameters.

| Compound                                 | Interplanar distance (Å)                   | centroid-centroid distance (Å) | shift distance(Å) | Symmetry operator |
|------------------------------------------|--------------------------------------------|--------------------------------|-------------------|-------------------|
| (±)-2-CH <sub>3</sub>                    | 3.564                                      | 3.974                          | 1.815             | 1-x, 2-y, 1-z     |
| (±)-2-Cl                                 | 3.536                                      | 4.150                          | 2.172             | 1-x, 1-y, 1-z     |
| D-2-CH <sub>3</sub> /L-2-Cl              | 3.529                                      | 4.030                          | 1.946             | x, 1+y, z         |
| L-1-CH <sub>3</sub> /D-2-CH <sub>3</sub> | 3.567                                      | 4.019                          | 1.852             | x, 1+y, z         |
| D-1-Cl/L-2-Cl                            | 3.586                                      | 4.198                          | 2.182             | x, 1+y, z         |
| D-1-CH <sub>3</sub> /L-2-Cl              | 3.539                                      | 4.105                          | 2.078             | x, 1+y, z         |
| D-1-Cl/L-2-CH <sub>3</sub>               | 3.460                                      | 4.100                          | 2.200             | x, 1+y, z         |
| (±)-1-H                                  | Aryl groups do not approximate coplanarity |                                |                   |                   |
| (±)-2-H                                  | Aryl groups do not approximate coplanarity |                                |                   |                   |
| D-2-H/L-2-CF <sub>3</sub>                | 3.493                                      | 5.106                          | 3.725             | x, 1+y, z         |
| D-1-H/L-2-H                              | 3.351                                      | 4.922                          | 3.605             | x, 1+y, z         |
| L-1-CF <sub>3</sub> /D-2-CF <sub>3</sub> | Aryl groups do not approximate coplanarity |                                |                   |                   |
| D-1-CF <sub>3</sub> /L-2-H               | 3.581                                      | 3.523                          | 2.771             | x, -1+y, z        |

## SI 4. CCDC Crystal Structure Similarities

The Crystal Packing Similarity facility in CCDC-Mercury (2022.3.0) was used to understand the structural similarity of the CH<sub>3</sub>/Cl and H/CF<sub>3</sub> racemic and quasiracemic crystal structures. This search was restricted to a packing shell size of 15 molecules with 30% distance and angle tolerances. When comparing crystal structures, molecular differences and structure inversion were allowed, and hydrogen positions, bond types, and hydrogen atoms and bond counts for each atom were ignored. Table S4 shows the results from comparing all possible structural pairings for these systems as root-mean-square values with the molecules in common provided in parentheses. Highlighted cells indicate structure pairs that have at least four molecules/units in common, indicating a significant level of structural similarity.

Table S4. Results from a CCDC-Mercury Crystal Packing Similarity search of the CH<sub>3</sub>/Cl and H/CF<sub>3</sub> systems of **1** and **2**. Cell values include the root-mean-square agreement of the structural pair with the number of common molecules/units provided in parentheses.

|                                          |          | (±)-1-CH <sub>3</sub> | (±)-1-Cl  | (±)-2-CH <sub>3</sub> | (±)-2-Cl  | D-1-CH <sub>3</sub> /L-1-Cl | D-2-CH <sub>3</sub> /L-2-Cl | L-1-CH <sub>3</sub> /D-2-CH <sub>3</sub> | D-1-Cl/L-2-Cl | D-1-CH <sub>3</sub> /L-2-Cl | D-1-Cl/L-2-CH <sub>3</sub> | (±)-1-H | (±)-1-CF <sub>3</sub> | (±)-2-H  | D-2-H/L-2-CF <sub>3</sub> | L-1-H/D-2-H | L-1-CF <sub>3</sub> /D-2-CF <sub>3</sub> | D-1-CF <sub>3</sub> /L-2-H |
|------------------------------------------|----------|-----------------------|-----------|-----------------------|-----------|-----------------------------|-----------------------------|------------------------------------------|---------------|-----------------------------|----------------------------|---------|-----------------------|----------|---------------------------|-------------|------------------------------------------|----------------------------|
|                                          |          | Form II               | Form II   | Form I                | Form I    | Form II                     | Form I                      | Form I                                   | Form I        | Form I                      | Form I                     | Form I  | Form II               | Form I   | Form I                    | Form I      | Form I-v                                 | Form I                     |
| (±)-1-CH <sub>3</sub>                    | Form II  | -                     | 0.31 (15) | 0.45 (1)              | 1.47 (3)  | 0.18 (15)                   | 1.77 (3)                    | 1.63 (3)                                 | 1.47 (3)      | 1.50 (3)                    | 0.50 (1)                   |         |                       |          |                           |             |                                          |                            |
| (±)-1-Cl                                 | Form II  |                       | -         | 1.22 (3)              | 1.19 (3)  | 0.15 (15)                   | 0.49 (1)                    | 1.42 (3)                                 | 1.31 (3)      | 1.47 (2)                    | 0.54 (1)                   |         |                       |          |                           |             |                                          |                            |
| (±)-2-CH <sub>3</sub>                    | Form I   |                       |           | -                     | 0.26 (15) | 1.19 (3)                    | 0.14 (15)                   | 0.31 (10)                                | 0.43 (9)      | 0.45 (8)                    | 0.33 (9)                   |         |                       |          |                           |             |                                          |                            |
| (±)-2-Cl                                 | Form I   |                       |           |                       | -         | 1.18 (3)                    | 0.15 (15)                   | 0.21 (9)                                 | 0.24 (8)      | 0.21 (8)                    | 0.26 (10)                  |         |                       |          |                           |             |                                          |                            |
| D-1-CH <sub>3</sub> /L-1-Cl              | Form II  |                       |           |                       |           | -                           | 1.18 (3)                    | 1.33 (3)                                 | 1.36 (3)      | 1.28 (3)                    | 1.35 (3)                   |         |                       |          |                           |             |                                          |                            |
| D-2-CH <sub>3</sub> /L-2-Cl              | Form I   |                       |           |                       |           |                             | -                           | 0.22 (9)                                 | 0.34 (9)      | 0.41 (8)                    | 0.25 (9)                   |         |                       |          |                           |             |                                          |                            |
| L-1-CH <sub>3</sub> /D-2-CH <sub>3</sub> | Form I   |                       |           |                       |           |                             |                             | -                                        | 0.22 (15)     | 0.14 (15)                   | 0.10 (15)                  |         |                       |          |                           |             |                                          |                            |
| D-1-Cl/L-2-Cl                            | Form I   |                       |           |                       |           |                             |                             |                                          | -             | 0.10 (15)                   | 0.13 (15)                  |         |                       |          |                           |             |                                          |                            |
| D-1-CH <sub>3</sub> /L-2-Cl              | Form I   |                       |           |                       |           |                             |                             |                                          |               | -                           | 0.58 (4)                   |         |                       |          |                           |             |                                          |                            |
| D-1-Cl/L-2-CH <sub>3</sub>               | Form I   |                       |           |                       |           |                             |                             |                                          |               |                             | -                          |         |                       |          |                           |             |                                          |                            |
| (±)-1-H                                  | Form I   | 1.77 (3)              | 1.77 (3)  | 1.14 (6)              | 0.92 (6)  | 1.73 (3)                    | 1.15 (6)                    | 1.14 (6)                                 | 1.03 (9)      | 1.13 (8)                    | 1.08 (8)                   | -       | 0.97 (2)              | 0.67 (9) | 1.19 (4)                  | 0.71 (7)    | 2.02 (8)                                 | 0.81 (5)                   |
| (±)-1-CF <sub>3</sub>                    | Form II  | 0.77 (9)              | 0.72 (8)  | 1.49 (3)              | 1.47 (3)  | 0.65 (5)                    | 2.91 (3)                    | 1.59 (3)                                 | 1.57 (3)      | 0.97 (2)                    | 0.73 (1)                   |         | -                     | 1.40 (3) | 1.24 (2)                  | 1.45 (3)    | 0.71 (1)                                 | 0.57 (1)                   |
| (±)-2-H                                  | Form I   | 1.55 (3)              | 1.61 (3)  | 0.95 (15)             | 0.72 (15) | 1.50 (3)                    | 0.85 (15)                   | 0.88 (9)                                 | 0.81 (10)     | 0.68 (7)                    | 0.81 (9)                   |         |                       | -        | 1.72 (6)                  | 0.35 (13)   | 1.77 (14)                                | 0.77 (8)                   |
| D-2-H/L-2-CF <sub>3</sub>                | Form I   | 0.93 (2)              | 1.03 (2)  | 1.54 (2)              | 0.61 (5)  | 1.80 (3)                    | 1.53 (2)                    | 1.60 (1)                                 | 1.61 (4)      | 1.11 (7)                    | 1.59 (1)                   |         |                       |          | -                         | 1.02 (4)    | 1.50 (1)                                 | 0.91 (10)                  |
| L-1-H/D-2-H                              | Form I   | 1.47 (3)              | 1.61 (3)  | 0.77 (9)              | 0.57 (10) | 1.41 (3)                    | 0.68 (10)                   | 0.71 (9)                                 | 0.56 (8)      | 0.62 (8)                    | 0.63 (9)                   |         |                       |          |                           | -           | 1.83 (8)                                 | 0.61 (15)                  |
| L-1-CF <sub>3</sub> /D-2-CF <sub>3</sub> | Form I-v | 0.51 (1)              | 0.55 (1)  | 1.70 (4)              | 1.80 (8)  | 0.53 (1)                    | 0.99 (3)                    | 1.71 (4)                                 | 0.80 (4)      | 1.00 (4)                    | 0.99 (4)                   |         |                       |          |                           |             | -                                        | 0.86 (4)                   |
| D-1-CF <sub>3</sub> /L-2-H               | Form I   | 1.52 (2)              | 1.50 (3)  | 0.81 (9)              | 0.47 (8)  | 0.57 (2)                    | 0.72 (9)                    | 0.69 (8)                                 | 0.59 (11)     | 0.59 (11)                   | 0.72 (5)                   |         |                       |          |                           |             |                                          | -                          |

## SI 5. Crystal Lattice Energy Calculations and Assessments

### Crystal Lattice Energy Calculations

Crystal lattice energies ( $E_{Latt}$ ) were determined for the 17 crystal structures included in this study by analyzing residue-to-residue contacts. The software package *Crystal Explorer*<sup>8</sup>, equipped with Gaussian16<sup>9</sup>, was used to create molecular assemblies from a cluster radius of 10 Å with  $E_{Latt}$  values computed by direct summation of interaction energies (*i.e.*, electrostatic, dispersion, polarization, and repulsion) with the central molecule and molecules included in the cluster. Several of the structure containing leucanyl [(±)-1-CF<sub>3</sub>, L-1-H/D-2-H, and D-1-CF<sub>3</sub>/L-2-H] and CF<sub>3</sub> [L-1-CF<sub>3</sub>/D-2-CF<sub>3</sub>, D-1-CF<sub>3</sub>/L-2-H] groups exhibit disorder. The lattice calculations for these systems were performed on each disorder component, and their contribution was weighted using the corresponding occupancy factors from the crystallographic data. Averaging the data for the  $Z' > 1$  structures provided a process for determining overall crystal  $E_{Latt}$  values.

### Differential Scanning Calorimetry

Differential scanning calorimetry (DSC) measurements were performed using a TA DSC 25 calorimeter. Each sample was heated to approximately 15°C below the melting point at a rate of 5°C/min and then cooled at 10°C/min. Samples of 1-4 milligrams were sealed in Tzero aluminum pans, and the heat flow as a function of temperature was measured and compared to a reference pan.

Table S5. Crystal Lattice Energy Determinations for Racemic and Quasiracemic Leucine **1** and Phenylalanine **2** systems.

| Compound                                 | Crystal Form | Crystal Lattice Energies, $E_{Latt}$<br>(kJ mol <sup>-1</sup> ) |       | Density (g mL <sup>-1</sup> ) | Melting Point (°C) |
|------------------------------------------|--------------|-----------------------------------------------------------------|-------|-------------------------------|--------------------|
|                                          |              | Crystal Explorer                                                | DSC   |                               |                    |
| (±)-1-CH <sub>3</sub>                    | II           | -171.8                                                          | -83.7 | 1.189                         | 125.9              |
| (±)-1-Cl                                 | II           | -163.8                                                          | -64.7 | 1.297                         | 200.7              |
| (±)-2-CH <sub>3</sub>                    | I            | -189.5                                                          | -91.4 | 1.276                         | 194.0              |
| (±)-2-Cl                                 | I            | -187.6                                                          | -71.5 | 1.385                         | 189.5              |
| D-1-CH <sub>3</sub> /L-1-Cl              | II           | -169.6                                                          | -52.7 | 1.244                         | 183.5              |
| D-2-CH <sub>3</sub> /L-2-Cl              | I            | -187.2                                                          | -81.3 | 1.327                         | 198.3              |
| L-1-CH <sub>3</sub> /D-2-CH <sub>3</sub> | I            | -179.5                                                          | -69.3 | 1.232                         | 183.4              |
| D-1-Cl/L-2-Cl                            | I            | -178.1                                                          | -59.4 | 1.351                         | 155.1              |
| D-1-CH <sub>3</sub> /L-2-Cl              | I            | -177.9                                                          | -62.0 | 1.291                         | 152.7              |
| D-1-Cl/L-2-CH <sub>3</sub>               | I            | -177.0                                                          | -67.5 | 1.293                         | 155.6              |
| (±)-1-H                                  | I            | -161.5                                                          | -51.7 | 1.241                         | 141.1              |
| (±)-1-CF <sub>3</sub>                    | II           | -164.0                                                          | -50.5 | 1.373                         | 171.5              |
| (±)-2-H                                  | I            | -182.9                                                          | -47.1 | 1.321                         | 168.0              |
| D-2-H/L-2-CF <sub>3</sub>                | I            | -193.8                                                          | -40.6 | 1.379                         | 157.9              |
| L-1-H/D-2-H                              | I            | -168.5                                                          | -42.5 | 1.248                         | 150.9              |
| D-1-CF <sub>3</sub> /L-2-CF <sub>3</sub> | variant of I | -172.0                                                          | -58.7 | 1.368                         | 174.8              |
| D-1-CF <sub>3</sub> /L-2-H               | I            | -173.4                                                          | -42.5 | 1.312                         | 160.6              |

## SI 6. Crystal Structure Cavity Space and Packing Efficiency Determinations

Void calculations for each of the crystal structures were determined using the CCDC-Mercury<sup>10</sup>. The process included removing the individual amino acid R groups (leucine,  $\text{CH}_2\text{CH}(\text{CH}_3)_2$ ; phenylalanine,  $\text{CH}_2\text{C}_6\text{H}_5$ ) and determining the cavity space volume using a 1.4 Å probe radius with 0.1 Å grid spacing. In the cases of disordered leucine groups, all components R group components were omitted prior to void space determinations. Fig. S1 shows the void spaces for quasiracemate D-1-CH<sub>3</sub>/L-2-Cl with views projected down the *c*- and *b*-axes. Cavity space data (Table S6), including cavity space packing efficiencies ( $C_p$ ), are provided below.  $C_p$  values were determined using  $V_{\text{group}}/V_{\text{cavity}}$ , where  $V_{\text{leucine}} = 71.6 \text{ \AA}^3$  and  $V_{\text{phenylalanine}} = 85.8 \text{ \AA}^3$ .<sup>11</sup>

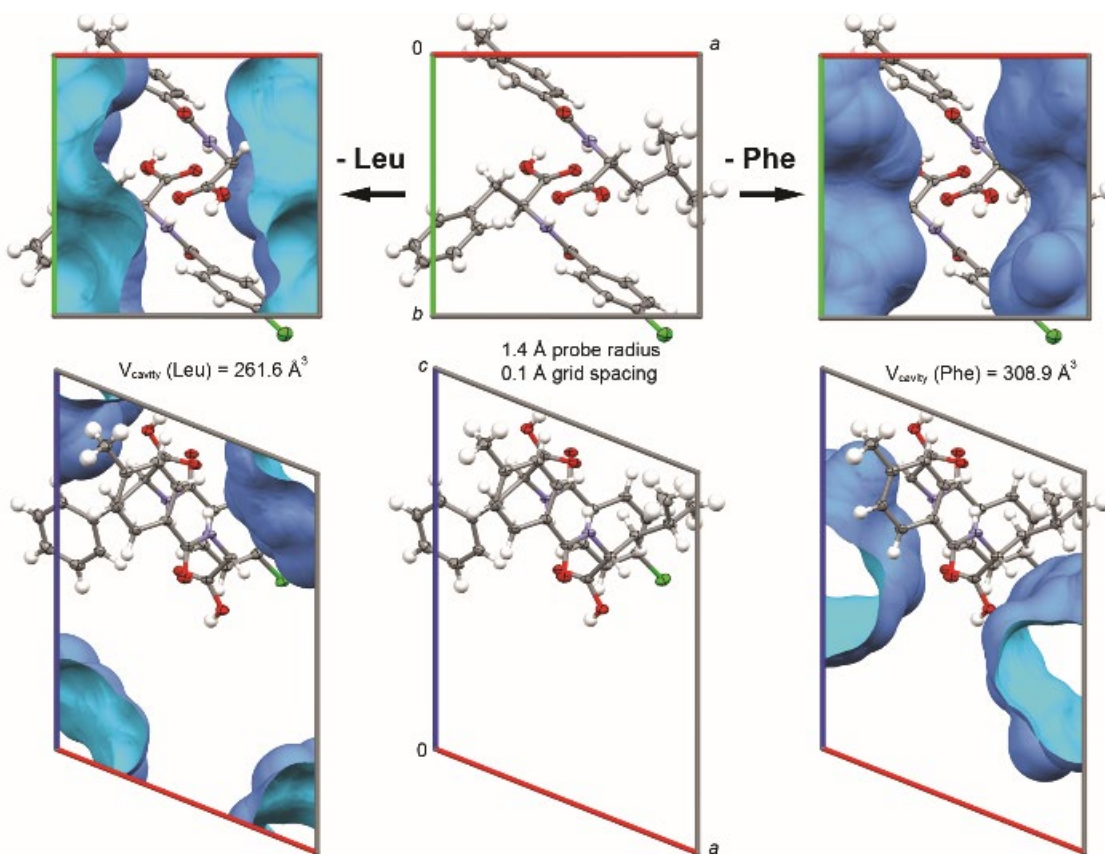

Fig. S1 Views of the unit cell and cavity space determinations for quasiracemate D-1-CH<sub>3</sub>/L-2-Cl projected down the *c* and *b*-axes.

Table S6. Leucine and phenylalanine void space volumes and packing efficiencies.

| Structure                                | Space group        | Z | Group Volumes (Å <sup>3</sup> ) determined using<br>CCDC-Mercury. |        |        |        | Group Packing Efficiencies (C <sub>p</sub> =<br>V <sub>group</sub> */V <sub>cavity</sub> ) |                       |                       |                       |
|------------------------------------------|--------------------|---|-------------------------------------------------------------------|--------|--------|--------|--------------------------------------------------------------------------------------------|-----------------------|-----------------------|-----------------------|
|                                          |                    |   | Leu(1)                                                            | Leu(2) | Phe(1) | Phe(2) | C <sub>p</sub> (Leu1)                                                                      | C <sub>p</sub> (Leu2) | C <sub>p</sub> (Phe1) | C <sub>p</sub> (Phe2) |
| (±)-1-CH <sub>3</sub>                    | P2 <sub>1</sub> /c | 4 | 120.3                                                             |        |        |        | 0.60                                                                                       |                       |                       |                       |
| (±)-1-Cl                                 | P2 <sub>1</sub> /c | 4 | 119.4                                                             |        |        |        | 0.60                                                                                       |                       |                       |                       |
| (±)-2-CH <sub>3</sub>                    | P2 <sub>1</sub> /c | 4 |                                                                   |        | 158.0  |        |                                                                                            | 0.54                  |                       |                       |
| (±)-2-Cl                                 | P2 <sub>1</sub> /c | 4 |                                                                   |        | 156.0  |        |                                                                                            | 0.55                  |                       |                       |
| D-1-CH <sub>3</sub> /L-1-Cl              | P2 <sub>1</sub>    | 2 | 112.2                                                             | 108.3  |        |        | 0.64                                                                                       | 0.66                  |                       |                       |
| D-2-CH <sub>3</sub> /L-2-Cl              | P2 <sub>1</sub>    | 2 |                                                                   |        | 151.8  | 151.8  |                                                                                            |                       | 0.56                  |                       |
| L-1-CH <sub>3</sub> /D-2-CH <sub>3</sub> | P2 <sub>1</sub>    | 2 | 132.9                                                             |        | 155.4  |        | 0.54                                                                                       |                       | 0.55                  |                       |
| D-1-Cl/L-2-Cl                            | P2 <sub>1</sub>    | 2 | 129.1                                                             |        | 154.4  |        | 0.55                                                                                       |                       | 0.56                  |                       |
| D-1-CH <sub>3</sub> /L-2-Cl              | P2 <sub>1</sub>    | 2 | 130.8                                                             |        | 154.4  |        | 0.55                                                                                       |                       | 0.56                  |                       |
| D-1-Cl/L-2-CH <sub>3</sub>               | P2 <sub>1</sub>    | 2 | 129.6                                                             |        | 155.1  |        | 0.55                                                                                       |                       | 0.55                  |                       |
| (±)-1-H                                  | P2 <sub>1</sub> /c | 4 | 112.7                                                             |        |        |        | 0.64                                                                                       |                       |                       |                       |
| (±)-1-CF <sub>3</sub>                    | P2 <sub>1</sub> /c | 4 | 127.2                                                             |        |        |        | 0.56                                                                                       |                       |                       |                       |
| (±)-2-H                                  | P2 <sub>1</sub> /c | 4 |                                                                   |        | 150.1  |        |                                                                                            |                       | 0.57                  |                       |
| D-2-H/L-2-CF <sub>3</sub>                | P2 <sub>1</sub>    | 2 |                                                                   |        | 153.5  | 143.8  |                                                                                            |                       | 0.56                  |                       |
| L-1-H/D-2-H                              | P2 <sub>1</sub>    | 2 | 145.7                                                             |        | 154.1  |        | 0.49                                                                                       |                       | 0.56                  |                       |
| D-1-CF <sub>3</sub> /L-2-CF <sub>3</sub> | P2 <sub>1</sub>    | 2 | 119.7                                                             |        | 159.8  |        | 0.60                                                                                       |                       | 0.54                  |                       |
| D-1-CF <sub>3</sub> /L-2-H               | P2 <sub>1</sub>    | 2 | 127.2                                                             |        | 161.0  |        | 0.56                                                                                       |                       | 0.53                  |                       |

\* Side chain volumes for leucine (V<sub>CH<sub>2</sub>(CH<sub>3</sub>)<sub>2</sub> = 71.6 Å<sup>3</sup>) and phenylalanine (V<sub>CH<sub>2</sub>C<sub>6</sub>H<sub>5</sub> = 85.8 Å<sup>3</sup>).<sup>11</sup></sub></sub>

## SI 7. CCDC-CSD Search Parameters

CCDC Cambridge Structural Database<sup>12</sup> (CSD, vs. 5.43) searches were limited to organic entries with 3D coordinates. A search of trifluoromethyl aryl groups in the database resulted in 5804 hits. 2837 of these entries were flagged with 'disorder', and 2415 (42%) of these entries modeled the CF<sub>3</sub> disorder. The CSD contains 1163 entries with the leuciny fragment – *i.e.*, (CH<sub>3</sub>)<sub>2</sub>CH<sub>2</sub>CH(NH)C=O. 371 of these structures included 'disorder' in the entry, and 115 of these structures (9.9%) modeled disorder of the leucine group.

## References

- 1 A. Karmakar, C. L. Oliver, A. E. Platero-Prats, E. Laurila and L. Öhrström, *CrystEngComm*, 2014, **16**, 8243–8251.
- 2 L. Krause, R. Herbst-Irmer, G. M. Sheldrick and D. Stalke, *J Appl Crystallogr*, 2015, **48**, 3–10.
- 3 O. V. Dolomanov, L. J. Bourhis, R. J. Gildea, J. a. K. Howard and H. Puschmann, *J Appl Cryst*, 2009, **42**, 339–341.
- 4 G. M. Sheldrick, *Acta Cryst A*, 2015, **71**, 3–8.
- 5 G. M. Sheldrick, *Acta Cryst C*, 2015, **71**, 3–8.
- 6 D. J. Watkin and R. I. Cooper, *Chemistry*, 2020, **2**, 796–804.
- 7 R. W. W. Hooft, L. H. Straver and A. L. Spek, *J Appl Cryst*, 2008, **41**, 96–103.
- 8 P. R. Spackman, M. J. Turner, J. J. McKinnon, S. K. Wolff, D. J. Grimwood, D. Jayatilaka and M. A. Spackman, *J Appl Cryst*, 2021, **54**, 1006–1011.
- 9 M. J. Frisch, G. W. Trucks, H. B. Schlegel, G. E. Scuseria, M. A. Robb, J. R. Cheeseman, G. Scalmani, V. Barone, G. A. Petersson, H. Nakatsuji, X. Li, M. Caricato, A. V. Marenich, J. Bloino, B. G. Janesko, R. Gomperts, B. Mennucci, H. P. Hratchian, J. V. Ortiz, A. F. Izmaylov, J. L. Sonnenberg, Williams, F. Ding, F. Lipparini, F. Egidi, J. Goings, B. Peng, A. Petrone, T. Henderson, D. Ranasinghe, V. G. Zakrzewski, J. Gao, N. Rega, G. Zheng, W. Liang, M. Hada, M. Ehara, K. Toyota, R. Fukuda, J. Hasegawa, M. Ishida, T. Nakajima, Y. Honda, O. Kitao, H. Nakai, T. Vreven, K. Throssell, J. A. Montgomery Jr., J. E. Peralta, F. Ogliaro, M. J. Bearpark, J. J. Heyd, E. N. Brothers, K. N. Kudin, V. N. Staroverov, T. A. Keith, R. Kobayashi, J. Normand, K. Raghavachari, A. P. Rendell, J. C. Burant, S. S. Iyengar, J. Tomasi, M. Cossi, J. M. Millam, M. Klene, C. Adamo, R. Cammi, J. W. Ochterski, R. L. Martin, K. Morokuma, O. Farkas, J. B. Foresman and D. J. Fox, Gaussian 16 Rev. C.01 2016.
- 10 C. F. Macrae, I. Sovago, S. J. Cottrell, P. T. A. Galek, P. McCabe, E. Pidcock, M. Platings, G. P. Shields, J. S. Stevens, M. Towler and P. A. Wood, *J Appl Cryst*, 2020, **53**, 226–235.
- 11 S. Sirimulla, M. Lerma and W. C. Herndon, *J. Chem. Inf. Model.*, 2010, **50**, 194–204.
- 12 C. R. Groom, I. J. Bruno, M. P. Lightfoot and S. C. Ward, *Acta Cryst B*, 2016, **72**, 171–179.
